# Supplementary material for: Dynamic Transcriptional Landscape of the Early Chick Embryo
Source: Front Cell Dev Biol. 2019 Sep 12;7:196. doi: 10.3389/fcell.2019.00196 (PMC6751280; doi:10.3389/fcell.2019.00196)
Supplement: Table S2 — Summary of data generated by Iso-Seq (XLS 14 kb). [file Table_2.XLSX]

## Sheet: Sheet1
Sample Name	Sample ID	cDNA size	SMRT Cells	Sequence Data	Reads of Insert	Read Bases of Insert	Mean Read Length of Insert	Mean Read Quality of Insert	Mean Number of Passes	Reads of Insert	Number of five prime reads	Number of three prime reads	Number of poly-A reads	Number of filtered short reads	Number of non-full-length reads	Number of full-length reads	Number of full-length non-chimeric reads	Average full-length non-chimeric read length	Full-Length Percentage (FL%)	Artificial Concatemers（%）	Number of consensus isoforms	Average consensus isoforms read length	Number of polished high-quality isoforms	Number of polished low-quality isoforms	Percent of polished high-quality isoforms(%)
E1(Sequel)	F01	1-6K	1	8.52G	439826	1160891876	2639	0.93	6	439826	314172	328590	324171	9408	156346	274072	272921	2796	0.6231	0.0042	154892	2766	23676	130786	0.1529
E3(Sequel)	F02	1-6K	1	7.70G	535388	1342243421	2507	0.9	4	535388	314681	339274	332115	18138	253916	263334	261160	2709	0.4919	0.0083	151867	2748	20417	130809	0.1344
E5(Sequel)	F03	1-6K	1	9.02G	556032	1334886925	2400	0.92	5	556032	358428	381975	374892	16007	232285	307740	305309	2516	0.5535	0.0079	179064	2543	24626	153940	0.1375
E7(Sequel)	F04	1-6K	1	9.24G	587079	1402691463	2389	0.92	5	587079	381427	408333	400435	17632	243212	326235	323571	2553	0.5557	0.0082	194039	2581	26230	167053	0.1352
E1(RSII)	F05	1-2K	1	3.22G	80649	235152986	2915	0.92	11	80649	40049	46473	44854	11334	35647	33668	33584	1672	0.4175	0.0025	8510	1571	7479	1031	0.8788
E1(RSII)	F05	2-3K	1	2.57G	64166	217719641	3393	0.92	9	64166	37989	41409	40769	3856	28331	31979	31923	2853	0.4984	0.0018	8942	2662	7242	1700	0.8099
E1(RSII)	F05	3-6K	1	2.74G	66376	239186343	3603	0.91	8	66376	37948	41802	40969	3289	32189	30898	30806	3456	0.4655	0.003	12585	3561	8797	3788	0.699
E3(RSII)	F06	1-2K	1	3.21G	86775	168634312	1943	0.94	16	86775	52609	58821	56828	10607	30996	45172	44885	1406	0.5206	0.0064	12266	1475	10897	1369	0.8884
E3(RSII)	F06	2-3K	1	3.30G	73089	262426341	3590	0.92	9	73089	37630	42715	41387	8027	33707	31355	31137	2347	0.429	0.007	9877	2418	8136	1741	0.8237
E3(RSII)	F06	3-6K	1	2.02G	56949	212061547	3723	0.91	7	56949	34032	37135	36312	2086	27515	27348	27220	3774	0.4802	0.0047	12220	3951	7590	4630	0.6211
E5(RSII)	F07	1-2K	2	4.46G	134803	299823024	2224	0.93	12	134803	79023	88339	86020	14568	52006	68229	67632	1516	0.5061	0.0087	18514	1532	15541	2973	0.8394
E5(RSII)	F07	2-3K	1	3.21G	70433	272324963	3866	0.9	7	70433	30540	37833	36179	9133	36898	24402	24248	2411	0.3465	0.0063	11883	2448	9233	2650	0.777
E5(RSII)	F07	3-6K	1	2.57G	63582	241086844	3791	0.91	8	63582	36170	39846	38979	3540	30096	29946	29831	3307	0.471	0.0038	11692	3679	7411	4281	0.6339
E7(RSII)	F08	1-2K	1	2.95G	74181	191203450	2577	0.92	13	74181	37669	44623	42915	10182	32116	31883	31581	1492	0.4298	0.0095	10906	1537	9439	1467	0.8655
E7(RSII)	F08	2-3K	1	2.82G	61789	217447405	3519	0.91	9	61789	31940	36941	36003	5936	29072	26781	26604	2334	0.4334	0.0066	11175	2435	8870	2305	0.7937
E7(RSII)	F08	3-6K	1	2.34G	61213	222421828	3633	0.91	8	61213	34276	38301	37417	2954	30453	27806	27695	3552	0.4542	0.004	13481	3791	8273	5208	0.6137
