# Supplementary material for: Dynamic Transcriptional Landscape of the Early Chick Embryo
Source: Front Cell Dev Biol. 2019 Sep 12;7:196. doi: 10.3389/fcell.2019.00196 (PMC6751280; doi:10.3389/fcell.2019.00196)
Supplement: Table S3 — Summary of data generated by RNA-Seq (XLS 14 kb). [file Table_3.XLSX]

## Sheet: Sheet1
#SampleID	BMK-ID	Raw_Read	Rawdata(G)	Clean Reads	Clean_Data(G)	BaseSum	GC(%)	N(%)	Q30(%)	Mapped Reads	Uniq Mapped Reads	Multiple Mapped Reads	Reads Map to '+'	Reads Map to '-'
E1-1	L01	54447192	16.3342	108283334	16.2121	16212134410	51.48	0	95.43	96040404(88.69%)	90064446(83.17%)	5975958(5.52%)	46818206(43.24%)	46826976(43.24%)
E1-2	L02	52908265	15.8725	105247068	15.7495	15749472524	54.19	0	95.38	89618535(85.15%)	82348478(78.24%)	7270057(6.91%)	42986578(40.84%)	43044214(40.90%)
E1-3	L03	55251944	16.5756	110007220	16.4672	16467176304	54.3	0	95.04	94085419(85.53%)	87042052(79.12%)	7043367(6.40%)	45387786(41.26%)	45435309(41.30%)
E2-1	L04	36256415	10.8769	71900462	10.7292	10729205112	51.22	0	95.47	65632980(91.28%)	61346706(85.32%)	4286274(5.96%)	31681099(44.06%)	31704412(44.09%)
E2-2	L05	47314567	14.1944	94077574	14.0711	14071104172	50.48	0	95.49	85894817(91.30%)	80416386(85.48%)	5478431(5.82%)	41574595(44.19%)	41605756(44.22%)
E2-3	L06	43551440	13.0654	86503450	12.9336	12933643508	50.63	0	95.54	78807142(91.10%)	73751016(85.26%)	5056126(5.84%)	38058693(44.00%)	38092065(44.04%)
E3-1	L07	41960636	12.5882	83410432	12.4693	12469333806	51.63	0	95.4	75320850(90.30%)	69418946(83.23%)	5901904(7.08%)	36070099(43.24%)	36123769(43.31%)
E3-2	L08	39865483	11.9596	79091428	11.8191	11819125656	52.18	0	95.47	70349338(88.95%)	64418689(81.45%)	5930649(7.50%)	33428193(42.27%)	33468345(42.32%)
E3-3	L09	53868831	16.1606	107139070	16.0069	16006895924	52.06	0	95.45	95714367(89.34%)	87777050(81.93%)	7937317(7.41%)	45560637(42.52%)	45609990(42.57%)
E4-1	L10	59156015	17.7468	117494688	17.5764	17576379924	50.25	0	95.03	107348406(91.36%)	99421846(84.62%)	7926560(6.75%)	47836464(40.71%)	47893830(40.76%)
E4-2	L11	51433693	15.4301	102151528	15.2582	15258229578	49.61	0	95.16	93584901(91.61%)	87013903(85.18%)	6570998(6.43%)	44839953(43.90%)	44909921(43.96%)
E4-3	L12	49059959	14.718	97336362	14.5579	14557881116	50.25	0	95.02	87581225(89.98%)	80912021(83.13%)	6669204(6.85%)	41855672(43.00%)	41894799(43.04%)
E5-1	L13	51360367	15.4081	101851764	15.2019	15201948132	50.43	0	94.98	93343118(91.65%)	86170005(84.60%)	7173113(7.04%)	44437464(43.63%)	44501255(43.69%)
E5-2	L14	37608735	11.2826	74653472	11.1552	11155185210	49.98	0	94.61	68189131(91.34%)	63469954(85.02%)	4719177(6.32%)	32634376(43.71%)	32684196(43.78%)
E5-3	L15	48235701	14.4707	95753770	14.2971	14297121294	50.53	0	95.37	86319923(90.15%)	79483360(83.01%)	6836563(7.14%)	41221464(43.05%)	41272334(43.10%)
E6-1	L16	43850405	13.1551	87013194	13.0054	13005352850	49.34	0	94.83	80334717(92.32%)	74748253(85.90%)	5586464(6.42%)	38501411(44.25%)	38551694(44.31%)
E6-2	L17	57905324	17.3716	114831988	17.1535	17153460588	50.27	0	94.95	105369678(91.76%)	97011601(84.48%)	8358077(7.28%)	49973532(43.52%)	50030172(43.57%)
E6-3	L18	39763500	11.9291	78996438	11.8149	11814896472	49.29	0	95.16	72823493(92.19%)	67785092(85.81%)	5038401(6.38%)	34809443(44.06%)	34853159(44.12%)
E7-1	L19	43445245	13.0336	86513236	12.9394	12939364392	51.26	0	95.06	75859642(87.69%)	70533112(81.53%)	5326530(6.16%)	36274522(41.93%)	36332123(42.00%)
E7-2	L20	42249620	12.6749	84044116	12.5748	12574758588	49.25	0	95.45	77735385(92.49%)	72342949(86.08%)	5392436(6.42%)	37187199(44.25%)	37239553(44.31%)
E7-3	L21	54910064	16.473	109144672	16.3147	16314699246	48.95	0	95.26	101015203(92.55%)	93473249(85.64%)	7541954(6.91%)	48107454(44.08%)	48159623(44.12%)
E8-1	L22	59639702	17.8919	118588766	17.7424	17742392418	49.7	0	95.35	100139219(84.44%)	92472162(77.98%)	7667057(6.47%)	52125716(43.96%)	52174172(44.00%)
E8-2	L23	46897413	14.0692	93170086	13.9253	13925313248	49.78	0	95.23	85529704(91.80%)	78989597(84.78%)	6540107(7.02%)	40673164(43.65%)	40722031(43.71%)
E8-3	L24	41149450	12.3448	81788872	12.2359	12235856342	49.48	0	95.29	75563442(92.39%)	69876205(85.43%)	5687237(6.95%)	35880577(43.87%)	35917552(43.91%)
