# Supplementary material for: Dynamic Transcriptional Landscape of the Early Chick Embryo
Source: Front Cell Dev Biol. 2019 Sep 12;7:196. doi: 10.3389/fcell.2019.00196 (PMC6751280; doi:10.3389/fcell.2019.00196)
Supplement: Table S4 — List of enriched GO terms for different gene clusters (XLS 83 kb). [file Table_4.XLSX]

## Sheet: cluster 1
Category	Term	Count	%	PValue	Genes	List Total	Pop Hits	Pop Total	Fold Enrichment
GOTERM_BP_DIRECT	GO:0006412~translation	28	2.33528	2.12633e-06	430689, 425416, 100857770, 421694, 374053, 395796, 421121, 417871, 415551, 423832, 417264, 428442, 396448, 423795, 420356, 414782, 417574, 395958, 107051012, 417666, 421698, 770018, 419228, 100859914, 373937, 396325, 419442, 395849	729	126	8994	2.74166
GOTERM_BP_DIRECT	GO:0001707~mesoderm formation	12	0.925648	0.000544355	374156, 415783, 428443, 373912, 395828, 395494, 396165, 100858087, 395419, 395782, 395252,	729	50	8994	3.70123
GOTERM_BP_DIRECT	GO:0043408~regulation of MAPK cascade	9	0.750626	0.00164218	395529, 386572, 395622, 428759, 424197, 378779, 396165, 395120, 771058	729	29	8994	3.82886
GOTERM_BP_DIRECT	GO:0006474~N-terminal protein amino acid acetylation	4	0.333611	0.00466467	427461, 396066, 422109, 423547	729	5	8994	9.86996
GOTERM_BP_DIRECT	GO:0048468~cell development	9	0.750626	0.00484375	395529, 423163, 395622, 424197, 396165, 396390, 768789, 396392, 771058	729	34	8994	3.2658
GOTERM_BP_DIRECT	GO:0001843~neural tube closure	10	0.834028	0.00556994	421633, 769286, 416821, 395782, 373912, 419184, 423163, 417793, 396165, 423042	729	42	8994	2.93749
GOTERM_BP_DIRECT	GO:0030509~BMP signaling pathway	9	0.750626	0.00584368	395782, 395644, 425029, 373912, 395396, 416487, 378779, 396484, 771058	729	35	8994	3.17249
GOTERM_BP_DIRECT	GO:0060395~SMAD protein signal transduction	9	0.750626	0.00699315	395782, 425029, 396512, 395529, 395622, 424197, 378779, 396165, 771058	729	36	8994	3.08436
GOTERM_BP_DIRECT	GO:0006366~transcription from RNA polymerase II promoter	16	1.33445	0.00897739	769286, 420027, 420103, 395881, 423521, 395446, 771446, 396390, 396484, 396392, 420249, 396512, 771294, 395486, 418365, 768789	729	95	8994	2.07789
GOTERM_BP_DIRECT	GO:0019827~stem cell population maintenance	8	0.667223	0.0124354	769286, 100857575, 420027, 772213, 428443, 417172, 423864, 422684	729	32	8994	3.08436
GOTERM_BP_DIRECT	GO:0006383~transcription from RNA polymerase III promoter	5	0.417014	0.0124464	420249, 420103, 423727, 395486, 416620	729	12	8994	5.1406
GOTERM_BP_DIRECT	GO:0006955~immune response	17	1.41785	0.0140423	423163, 414830, 395872, 395908, 395196, 396495, 427635, 428067, 420361, 395552, 396216, 426928, 407090, 395468, 416307, 396249, 417465	729	109	8994	1.92419
GOTERM_BP_DIRECT	GO:0034101~erythrocyte homeostasis	4	0.333611	0.014431	396287, 374053, 415783, 423041	729	7	8994	7.04997
GOTERM_BP_DIRECT	GO:0040007~growth	6	0.500417	0.0153102	396132, 395622, 395494, 378779, 396165, 771058	729	19	8994	3.89604
GOTERM_BP_DIRECT	GO:0060502~epithelial cell proliferation involved in lung morphogenesis	3	0.250209	0.0185738	396349, 415549, 396165	729	3	8994	12.3374
GOTERM_BP_DIRECT	GO:0002232~leukocyte chemotaxis involved in inflammatory response	3	0.250209	0.0185738	395196, 395468, 396495	729	3	8994	12.3374
GOTERM_BP_DIRECT	GO:0002269~leukocyte activation involved in inflammatory response	3	0.250209	0.0185738	395196, 395468, 396495	729	3	8994	12.3374
GOTERM_BP_DIRECT	GO:0008219~cell death	6	0.500417	0.0190868	395722, 424629, 395786, 100859124, 395152, 396090	729	20	8994	3.70123
GOTERM_BP_DIRECT	GO:0014068~positive regulation of phosphatidylinositol 3-kinase signaling	9	0.750626	0.0203366	374196, 420161, 395323, 396216, 396331, 374128, 427213, 396249, 417465	729	43	8994	2.58226
GOTERM_BP_DIRECT	GO:0006364~rRNA processing	8	0.667223	0.0232969	417975, 420182, 427835, 107053767, 100857630, 374053, 770430, 423626	729	36	8994	2.74166
GOTERM_BP_DIRECT	GO:0007032~endosome organization	6	0.500417	0.0283568	423207, 420628, 428401, 428324, 420688, 424675	729	22	8994	3.36476
GOTERM_BP_DIRECT	GO:0046827~positive regulation of protein export from nucleus	4	0.333611	0.0306484	408037, 418737, 428081, 423525	729	9	8994	5.48331
GOTERM_BP_DIRECT	GO:0015909~long-chain fatty acid transport	3	0.250209	0.0351622	417220, 427237, 396393	729	4	8994	9.25309
GOTERM_BP_DIRECT	GO:0032411~positive regulation of transporter activity	3	0.250209	0.0351622	419166, 416548, 395133	729	4	8994	9.25309
GOTERM_BP_DIRECT	GO:0002115~store-operated calcium entry	3	0.250209	0.0351622	416845, 422799, 417509	729	4	8994	9.25309
GOTERM_BP_DIRECT	GO:0000302~response to reactive oxygen species	3	0.250209	0.0351622	424586, 424893, 415908	729	4	8994	9.25309
GOTERM_BP_DIRECT	GO:0002548~monocyte chemotaxis	5	0.417014	0.0353334	395552, 395082, 396495, 374128, 428067	729	16	8994	3.85545
GOTERM_BP_DIRECT	GO:0070374~positive regulation of ERK1 and ERK2 cascade	13	1.08424	0.0371434	374196, 419399, 395323, 395552, 415549, 418737, 107057091, 395082, 396165, 374128, 427213, 395603, 417840	729	84	8994	1.90937
GOTERM_BP_DIRECT	GO:0000460~maturation of 5.8S rRNA	4	0.333611	0.0412048	426924, 419140, 427206, 419454	729	10	8994	4.93498
GOTERM_BP_DIRECT	GO:0006883~cellular sodium ion homeostasis	4	0.333611	0.0412048	396530, 419166, 396549, 395133	729	10	8994	4.93498
GOTERM_BP_DIRECT	GO:0045454~cell redox homeostasis	9	0.750626	0.0413888	416428, 423585, 429208, 423584, 373914, 431417, 417214, 418601, 427826	729	49	8994	2.26606
GOTERM_BP_DIRECT	GO:0043123~positive regulation of I-kappaB kinase/NF-kappaB signaling	13	1.08424	0.0468488	396287, 423163, 100538349, 428067, 100859387, 426969, 423864, 422884, 416567, 423525, 422262, 427213, 430103	729	87	8994	1.84353
GOTERM_BP_DIRECT	GO:0030593~neutrophil chemotaxis	6	0.500417	0.0468639	430689, 395552, 373939, 395082, 396495, 423758	729	25	8994	2.96099
GOTERM_BP_DIRECT	GO:0070098~chemokine-mediated signaling pathway	5	0.417014	0.0522701	395552, 395872, 395082, 396495, 417465	729	18	8994	3.42707
GOTERM_BP_DIRECT	GO:0051897~positive regulation of protein kinase B signaling	8	0.667223	0.0553086	374196, 420161, 373981, 418737, 396216, 428067, 396249, 395097	729	43	8994	2.29534
GOTERM_BP_DIRECT	GO:0042119~neutrophil activation	3	0.250209	0.0554938	396495, 427213, 417465	729	5	8994	7.40247
GOTERM_BP_DIRECT	GO:0002726~positive regulation of T cell cytokine production	3	0.250209	0.0554938	423163, 417287, 414830	729	5	8994	7.40247
GOTERM_BP_DIRECT	GO:0060440~trachea formation	3	0.250209	0.0554938	396349, 415549, 396165	729	5	8994	7.40247
GOTERM_BP_DIRECT	GO:0046641~positive regulation of alpha-beta T cell proliferation	3	0.250209	0.0554938	396062, 420086, 396249	729	5	8994	7.40247
GOTERM_BP_DIRECT	GO:0051092~positive regulation of NF-kappaB transcription factor activity	9	0.750626	0.0614503	417628, 423163, 417287, 424991, 100538349, 416567, 418529, 428067, 423864	729	53	8994	2.09504
GOTERM_BP_DIRECT	GO:0034605~cellular response to heat	5	0.417014	0.0621261	396287, 427034, 420988, 378424, 420362	729	19	8994	3.2467
GOTERM_BP_DIRECT	GO:0006360~transcription from RNA polymerase I promoter	4	0.333611	0.066965	420249, 420103, 422910, 395486	729	12	8994	4.11248
GOTERM_BP_DIRECT	GO:0023019~signal transduction involved in regulation of gene expression	4	0.333611	0.066965	395782, 395792, 395623, 396484	729	12	8994	4.11248
GOTERM_BP_DIRECT	GO:0045087~innate immune response	14	1.16764	0.0672732	418581, 419125, 431014, 414830, 423727, 395313, 419280, 420086, 396393, 423864, 107057091, 421127, 771180, 416540	729	102	8994	1.69338
GOTERM_BP_DIRECT	GO:0006954~inflammatory response	16	1.33445	0.0751882	418581, 395872, 395196, 426794, 420086, 396495, 427620, 396393, 395337, 404297, 395552, 107057091, 395082, 421127, 417465, 100859040	729	124	8994	1.59193
GOTERM_BP_DIRECT	GO:2000778~positive regulation of interleukin-6 secretion	3	0.250209	0.0788558	415995, 427213, 415908	729	6	8994	6.16872
GOTERM_BP_DIRECT	GO:0060272~embryonic skeletal joint morphogenesis	3	0.250209	0.0788558	373912, 395786, 396165	729	6	8994	6.16872
GOTERM_BP_DIRECT	GO:0010862~positive regulation of pathway-restricted SMAD protein phosphorylation	6	0.500417	0.0804927	395529, 395622, 424197, 378779, 396165, 771058	729	29	8994	2.55258
GOTERM_BP_DIRECT	GO:0042102~positive regulation of T cell proliferation	5	0.417014	0.0845233	423163, 407090, 415995, 417465, 395337	729	21	8994	2.93749
GOTERM_BP_DIRECT	GO:0009887~organ morphogenesis	6	0.500417	0.0904791	395320, 423163, 395625, 428067, 396390, 396392	729	30	8994	2.46749
GOTERM_BP_DIRECT	GO:0018345~protein palmitoylation	4	0.333611	0.0983352	420705, 415995, 423843, 423130	729	14	8994	3.52499

## Sheet: cluster 2
Category	Term	Count	%	PValue	Genes	List Total	Pop Hits	Pop Total	Fold Enrichment
GOTERM_BP_DIRECT	GO:0033539~fatty acid beta-oxidation using acyl-CoA dehydrogenase	10	0.643087	1.84746e-06	415353, 417013, 420562, 417366, 420689, 416068, 415974, 424005, 419739, 416969	946	14	8994	6.791
GOTERM_BP_DIRECT	GO:0055088~lipid homeostasis	10	0.643087	1.67275e-05	415353, 417013, 420562, 417366, 420689, 416068, 415974, 424005, 419739, 416969	946	17	8994	5.59259
GOTERM_BP_DIRECT	GO:0006635~fatty acid beta-oxidation	11	0.707395	3.09979e-05	423979, 424646, 424877, 770094, 424487, 418968, 417366, 420218, 422715, 426847, 420533	946	22	8994	4.7537
GOTERM_BP_DIRECT	GO:0043171~peptide catabolic process	9	0.578778	4.72345e-05	395667, 107056878, 419838, 100858836, 427122, 428771, 421013, 419953, 420238	946	15	8994	5.70444
GOTERM_BP_DIRECT	GO:0005975~carbohydrate metabolic process	22	1.41479	5.37852e-05	378909, 416462, 419931, 415306, 425467, 427401, 431653, 428238, 426435, 416341, 423232, 424535, 422712, 424263, 100858486, 428569, 423103, 418909, 772383, 396547, 373997, 414140	946	80	8994	2.61453
GOTERM_BP_DIRECT	GO:0033344~cholesterol efflux	9	0.578778	8.57892e-05	421402, 395780, 424424, 421401, 396535, 396536, 373945, 419802, 416814	946	16	8994	5.34791
GOTERM_BP_DIRECT	GO:0043691~reverse cholesterol transport	7	0.450161	0.000191622	395780, 396136, 396536, 373945, 419802, 416814, 416967	946	10	8994	6.65518
GOTERM_BP_DIRECT	GO:0042730~fibrinolysis	7	0.450161	0.000191622	396297, 418046, 421580, 396307, 395306, 395837, 373926	946	10	8994	6.65518
GOTERM_BP_DIRECT	GO:0042632~cholesterol homeostasis	13	0.836013	0.000258299	395780, 422709, 396136, 416814, 419802, 421402, 421401, 396535, 396536, 373945, 420841, 395961, 417670	946	37	8994	3.34044
GOTERM_BP_DIRECT	GO:0018149~peptide cross-linking	7	0.450161	0.000700147	419215, 396133, 771144, 419216, 420869, 427805, 418268	946	12	8994	5.54598
GOTERM_BP_DIRECT	GO:0006520~cellular amino acid metabolic process	7	0.450161	0.00118527	420947, 420885, 107056878, 415454, 419838, 424517, 100858836	946	13	8994	5.11937
GOTERM_BP_DIRECT	GO:0050892~intestinal absorption	5	0.321543	0.00152659	395988, 396458, 373916, 427492, 416814	946	6	8994	7.92283
GOTERM_BP_DIRECT	GO:0006783~heme biosynthetic process	5	0.321543	0.00152659	374020, 418377, 426223, 552895, 416967	946	6	8994	7.92283
GOTERM_BP_DIRECT	GO:0006879~cellular iron ion homeostasis	8	0.514469	0.00223618	423984, 373916, 418046, 396191, 416891, 422168, 395938, 422326	946	19	8994	4.00312
GOTERM_BP_DIRECT	GO:0055114~oxidation-reduction process	21	1.35048	0.00333518	429062, 395729, 414841, 396025, 395267, 424224, 771920, 396437, 414798, 807640, 807638, 396069, 374066, 422917, 395970, 395940, 423625, 429082, 373997, 395938, 395172	946	100	8994	1.99655
GOTERM_BP_DIRECT	GO:0034380~high-density lipoprotein particle assembly	4	0.257235	0.00426305	395780, 396536, 373945, 419802	946	4	8994	9.5074
GOTERM_BP_DIRECT	GO:0042157~lipoprotein metabolic process	4	0.257235	0.00426305	769889, 395780, 396536, 419802	946	4	8994	9.5074
GOTERM_BP_DIRECT	GO:0034354~'de novo' NAD biosynthetic process from tryptophan	4	0.257235	0.00426305	424302, 421396, 769005, 424041	946	4	8994	9.5074
GOTERM_BP_DIRECT	GO:0008152~metabolic process	14	0.900322	0.00529787	423896, 418550, 415848, 769021, 426847, 420090, 395976, 374033, 420878, 419838, 426874, 100859645, 395374, 414896	946	57	8994	2.33515
GOTERM_BP_DIRECT	GO:0000910~cytokinesis	8	0.514469	0.00748555	395734, 416983, 100857269, 396469, 420765, 395869, 415544, 427808	946	23	8994	3.30692
GOTERM_BP_DIRECT	GO:0015677~copper ion import	4	0.257235	0.00982484	772063, 418879, 424275, 420541	946	5	8994	7.60592
GOTERM_BP_DIRECT	GO:0086073~bundle of His cell-Purkinje myocyte adhesion involved in cell communication	4	0.257235	0.00982484	420869, 428529, 429710, 418130	946	5	8994	7.60592
GOTERM_BP_DIRECT	GO:0010873~positive regulation of cholesterol esterification	4	0.257235	0.00982484	395780, 421543, 396536, 419802	946	5	8994	7.60592
GOTERM_BP_DIRECT	GO:0006749~glutathione metabolic process	7	0.450161	0.0108018	418302, 420818, 414895, 395938, 396322, 423374, 414896	946	19	8994	3.50273
GOTERM_BP_DIRECT	GO:0030855~epithelial cell differentiation	10	0.643087	0.0148257	417335, 416320, 408039, 423747, 423118, 418302, 420525, 422715, 416223, 395961	946	38	8994	2.50195
GOTERM_BP_DIRECT	GO:0019433~triglyceride catabolic process	5	0.321543	0.0151375	395780, 396535, 396536, 419802, 428994	946	10	8994	4.7537
GOTERM_BP_DIRECT	GO:0006637~acyl-CoA metabolic process	5	0.321543	0.0151375	420656, 428872, 429108, 769879, 423895	946	10	8994	4.7537
GOTERM_BP_DIRECT	GO:0008203~cholesterol metabolic process	8	0.514469	0.0152044	395998, 424424, 424276, 396136, 396535, 373945, 423600, 416967	946	26	8994	2.92535
GOTERM_BP_DIRECT	GO:0006729~tetrahydrobiopterin biosynthetic process	4	0.257235	0.0181231	374030, 396146, 395729, 425255	946	6	8994	6.33827
GOTERM_BP_DIRECT	GO:0051006~positive regulation of lipoprotein lipase activity	4	0.257235	0.0181231	417431, 395780, 396536, 419802	946	6	8994	6.33827
GOTERM_BP_DIRECT	GO:0031639~plasminogen activation	4	0.257235	0.0181231	417431, 396307, 395837, 373926	946	6	8994	6.33827
GOTERM_BP_DIRECT	GO:0006000~fructose metabolic process	4	0.257235	0.0181231	415906, 395217, 427308, 100859653	946	6	8994	6.33827
GOTERM_BP_DIRECT	GO:0033700~phospholipid efflux	4	0.257235	0.0181231	395780, 396536, 373945, 419802	946	6	8994	6.33827
GOTERM_BP_DIRECT	GO:0007588~excretion	4	0.257235	0.0181231	421402, 421401, 423472, 426806	946	6	8994	6.33827
GOTERM_BP_DIRECT	GO:0098911~regulation of ventricular cardiac muscle cell action potential	4	0.257235	0.0181231	420869, 428529, 429710, 418130	946	6	8994	6.33827
GOTERM_BP_DIRECT	GO:0045429~positive regulation of nitric oxide biosynthetic process	6	0.385852	0.020623	422585, 396146, 396481, 420133, 378898, 417185	946	16	8994	3.56527
GOTERM_BP_DIRECT	GO:0016311~dephosphorylation	5	0.321543	0.0218423	395830, 415906, 395080, 420034, 422927	946	11	8994	4.32155
GOTERM_BP_DIRECT	GO:0006641~triglyceride metabolic process	5	0.321543	0.0218423	417431, 424276, 422709, 418589, 423600	946	11	8994	4.32155
GOTERM_BP_DIRECT	GO:0055072~iron ion homeostasis	5	0.321543	0.0218423	396241, 396127, 419216, 395596, 422715	946	11	8994	4.32155
GOTERM_BP_DIRECT	GO:0051289~protein homotetramerization	8	0.514469	0.0273605	374030, 395729, 374066, 420818, 420218, 423600, 396231, 420180	946	29	8994	2.62273
GOTERM_BP_DIRECT	GO:0006869~lipid transport	7	0.450161	0.0279668	395998, 424262, 769889, 420663, 421079, 396535, 373945	946	23	8994	2.89356
GOTERM_BP_DIRECT	GO:0007264~small GTPase mediated signal transduction	25	1.60772	0.0290608	771782, 395734, 416983, 418044, 395114, 421273, 423664, 419527, 424636, 416016, 418173, 424017, 418869, 422187, 769515, 776504, 431569, 395869, 415544, 420649, 771592, 415520, 419885, 419261, 396153	946	153	8994	1.5535
GOTERM_BP_DIRECT	GO:0034372~very-low-density lipoprotein particle remodeling	4	0.257235	0.0292659	395780, 396136, 396536, 419802	946	7	8994	5.4328
GOTERM_BP_DIRECT	GO:0006826~iron ion transport	4	0.257235	0.0292659	396241, 395970, 422168, 416221	946	7	8994	5.4328
GOTERM_BP_DIRECT	GO:0046470~phosphatidylcholine metabolic process	4	0.257235	0.0292659	395780, 396136, 396536, 419802	946	7	8994	5.4328
GOTERM_BP_DIRECT	GO:0006541~glutamine metabolic process	5	0.321543	0.0300956	396458, 420818, 424381, 418386, 428994	946	12	8994	3.96142
GOTERM_BP_DIRECT	GO:0003081~regulation of systemic arterial blood pressure by renin-angiotensin	3	0.192926	0.0307745	422257, 421543, 419953	946	3	8994	9.5074
GOTERM_BP_DIRECT	GO:0051923~sulfation	3	0.192926	0.0307745	422661, 422662, 395227	946	3	8994	9.5074
GOTERM_BP_DIRECT	GO:0002003~angiotensin maturation	3	0.192926	0.0307745	418623, 431167, 428771	946	3	8994	9.5074
GOTERM_BP_DIRECT	GO:0030300~regulation of intestinal cholesterol absorption	3	0.192926	0.0307745	395780, 396536, 419802	946	3	8994	9.5074
GOTERM_BP_DIRECT	GO:0019805~quinolinate biosynthetic process	3	0.192926	0.0307745	424302, 421396, 424041	946	3	8994	9.5074
GOTERM_BP_DIRECT	GO:0034116~positive regulation of heterotypic cell-cell adhesion	3	0.192926	0.0307745	396307, 395837, 373926	946	3	8994	9.5074
GOTERM_BP_DIRECT	GO:0043420~anthranilate metabolic process	3	0.192926	0.0307745	424302, 421396, 424041	946	3	8994	9.5074
GOTERM_BP_DIRECT	GO:0097461~ferric iron import into cell	3	0.192926	0.0307745	772063, 424275, 420541	946	3	8994	9.5074
GOTERM_BP_DIRECT	GO:0042158~lipoprotein biosynthetic process	3	0.192926	0.0307745	396136, 396535, 396536	946	3	8994	9.5074
GOTERM_BP_DIRECT	GO:0006574~valine catabolic process	3	0.192926	0.0307745	423979, 423345, 420632	946	3	8994	9.5074
GOTERM_BP_DIRECT	GO:0072378~blood coagulation, fibrin clot formation	3	0.192926	0.0307745	395837, 373926, 373979	946	3	8994	9.5074
GOTERM_BP_DIRECT	GO:0019441~tryptophan catabolic process to kynurenine	3	0.192926	0.0307745	424302, 426785, 769005	946	3	8994	9.5074
GOTERM_BP_DIRECT	GO:0030168~platelet activation	6	0.385852	0.033926	396275, 422511, 395797, 396307, 395306, 373926	946	18	8994	3.16913
GOTERM_BP_DIRECT	GO:0070328~triglyceride homeostasis	5	0.321543	0.0399471	395780, 396536, 769087, 419802, 416814	946	13	8994	3.65669
GOTERM_BP_DIRECT	GO:0050435~beta-amyloid metabolic process	4	0.257235	0.0432307	426905, 415926, 425031, 419953	946	8	8994	4.7537
GOTERM_BP_DIRECT	GO:0045995~regulation of embryonic development	4	0.257235	0.0432307	420133, 423088, 396014, 404779	946	8	8994	4.7537
GOTERM_BP_DIRECT	GO:0043534~blood vessel endothelial cell migration	4	0.257235	0.0432307	396469, 396536, 416814, 374200	946	8	8994	4.7537
GOTERM_BP_DIRECT	GO:0090277~positive regulation of peptide hormone secretion	4	0.257235	0.0432307	771592, 396307, 395837, 373926	946	8	8994	4.7537
GOTERM_BP_DIRECT	GO:0045022~early endosome to late endosome transport	5	0.321543	0.0514122	427297, 415766, 416016, 421260, 420649	946	14	8994	3.3955
GOTERM_BP_DIRECT	GO:0006032~chitin catabolic process	3	0.192926	0.0572859	419931, 423103, 424535	946	4	8994	7.13055
GOTERM_BP_DIRECT	GO:0045723~positive regulation of fatty acid biosynthetic process	3	0.192926	0.0572859	395780, 396536, 419802	946	4	8994	7.13055
GOTERM_BP_DIRECT	GO:0051454~intracellular pH elevation	3	0.192926	0.0572859	422257, 416012, 417700	946	4	8994	7.13055
GOTERM_BP_DIRECT	GO:0002690~positive regulation of leukocyte chemotaxis	3	0.192926	0.0572859	422511, 419559, 395086	946	4	8994	7.13055
GOTERM_BP_DIRECT	GO:0020027~hemoglobin metabolic process	3	0.192926	0.0572859	419216, 419076, 423600	946	4	8994	7.13055
GOTERM_BP_DIRECT	GO:1902177~positive regulation of oxidative stress-induced intrinsic apoptotic signaling pathway	3	0.192926	0.0572859	422257, 395938, 395277	946	4	8994	7.13055
GOTERM_BP_DIRECT	GO:0019430~removal of superoxide radicals	3	0.192926	0.0572859	395780, 395938, 422810	946	4	8994	7.13055
GOTERM_BP_DIRECT	GO:0090080~positive regulation of MAPKKK cascade by fibroblast growth factor receptor signaling pathway	3	0.192926	0.0572859	425467, 418909, 428104	946	4	8994	7.13055
GOTERM_BP_DIRECT	GO:0006622~protein targeting to lysosome	4	0.257235	0.0598985	395998, 416016, 428014, 422638	946	9	8994	4.22551
GOTERM_BP_DIRECT	GO:0007369~gastrulation	4	0.257235	0.0598985	396399, 419261, 419593, 424804	946	9	8994	4.22551
GOTERM_BP_DIRECT	GO:0032402~melanosome transport	4	0.257235	0.0598985	424017, 396237, 421273, 415544	946	9	8994	4.22551
GOTERM_BP_DIRECT	GO:0034375~high-density lipoprotein particle remodeling	4	0.257235	0.0598985	396136, 396536, 416814, 428164	946	9	8994	4.22551
GOTERM_BP_DIRECT	GO:0043388~positive regulation of DNA binding	5	0.321543	0.0644751	395387, 417286, 395862, 421577, 396437	946	15	8994	3.16913
GOTERM_BP_DIRECT	GO:0050728~negative regulation of inflammatory response	8	0.514469	0.077365	374120, 419194, 428963, 396204, 419755, 396536, 420737, 395085	946	36	8994	2.11276
GOTERM_BP_DIRECT	GO:0016042~lipid catabolic process	8	0.514469	0.077365	769963, 429062, 416425, 423014, 396458, 418182, 423705, 423786	946	36	8994	2.11276
GOTERM_BP_DIRECT	GO:0007596~blood coagulation	8	0.514469	0.077365	423678, 421580, 395877, 395306, 418746, 768449, 395085, 395086	946	36	8994	2.11276
GOTERM_BP_DIRECT	GO:0008206~bile acid metabolic process	4	0.257235	0.0790818	770094, 427429, 426857, 395961	946	10	8994	3.80296
GOTERM_BP_DIRECT	GO:0045921~positive regulation of exocytosis	4	0.257235	0.0790818	396307, 395837, 373926, 420649	946	10	8994	3.80296
GOTERM_BP_DIRECT	GO:0030048~actin filament-based movement	4	0.257235	0.0790818	426359, 396469, 396072, 419085	946	10	8994	3.80296
GOTERM_BP_DIRECT	GO:0048568~embryonic organ development	4	0.257235	0.0790818	395712, 396399, 374251, 419593	946	10	8994	3.80296
GOTERM_BP_DIRECT	GO:0006807~nitrogen compound metabolic process	4	0.257235	0.0790818	421774, 418386, 429566, 416949	946	10	8994	3.80296
GOTERM_BP_DIRECT	GO:0006509~membrane protein ectodomain proteolysis	5	0.321543	0.0790925	426905, 396469, 374113, 427122, 373977	946	16	8994	2.97106
GOTERM_BP_DIRECT	GO:0007229~integrin-mediated signaling pathway	9	0.578778	0.0848542	395669, 396407, 418300, 396536, 415691, 420225, 374113, 373946, 424804	946	44	8994	1.9447
GOTERM_BP_DIRECT	GO:0070527~platelet aggregation	6	0.385852	0.0863022	395669, 396469, 427947, 396307, 395837, 373926	946	23	8994	2.48019
GOTERM_BP_DIRECT	GO:0006644~phospholipid metabolic process	6	0.385852	0.0863022	416425, 416508, 396136, 396536, 423705, 100858471	946	23	8994	2.48019
GOTERM_BP_DIRECT	GO:0051258~protein polymerization	3	0.192926	0.0889266	396307, 395837, 373926	946	5	8994	5.70444
GOTERM_BP_DIRECT	GO:0019853~L-ascorbic acid biosynthetic process	3	0.192926	0.0889266	428008, 416537, 395480	946	5	8994	5.70444
GOTERM_BP_DIRECT	GO:0031102~neuron projection regeneration	3	0.192926	0.0889266	395780, 396536, 419802	946	5	8994	5.70444
GOTERM_BP_DIRECT	GO:0010460~positive regulation of heart rate	3	0.192926	0.0889266	419194, 419559, 427352	946	5	8994	5.70444
GOTERM_BP_DIRECT	GO:0006892~post-Golgi vesicle-mediated transport	3	0.192926	0.0889266	395998, 396237, 418675	946	5	8994	5.70444
GOTERM_BP_DIRECT	GO:0010898~positive regulation of triglyceride catabolic process	3	0.192926	0.0889266	395780, 396536, 419802	946	5	8994	5.70444
GOTERM_BP_DIRECT	GO:0030195~negative regulation of blood coagulation	3	0.192926	0.0889266	417431, 418430, 395085	946	5	8994	5.70444
GOTERM_BP_DIRECT	GO:0006544~glycine metabolic process	3	0.192926	0.0889266	396458, 424381, 769879	946	5	8994	5.70444
GOTERM_BP_DIRECT	GO:0006531~aspartate metabolic process	3	0.192926	0.0889266	396458, 770953, 417185	946	5	8994	5.70444
GOTERM_BP_DIRECT	GO:0006629~lipid metabolic process	9	0.578778	0.0941964	418673, 770199, 422551, 421059, 427774, 423122, 768659, 423120, 428164	946	45	8994	1.90148
GOTERM_BP_DIRECT	GO:2000352~negative regulation of endothelial cell apoptotic process	5	0.321543	0.0951975	396307, 396014, 769087, 395837, 373926	946	17	8994	2.79629

## Sheet: cluster 3
Category	Term	Count	%	PValue	Genes	List Total	Pop Hits	Pop Total	Fold Enrichment
GOTERM_BP_DIRECT	GO:0006506~GPI anchor biosynthetic process	6	0.750939	0.000587926	418624, 428583, 101748971, 427290, 423271, 100858021	448	15	8994	8.03036
GOTERM_BP_DIRECT	GO:0009952~anterior/posterior pattern specification	10	1.25156	0.00160845	424139, 419759, 777548, 396301, 374213, 429940, 395844, 771214, 425096, 396230	448	56	8994	3.58498
GOTERM_BP_DIRECT	GO:0006342~chromatin silencing	6	0.750939	0.0019302	427881, 404299, 426617, 101749238, 417955, 426361	448	19	8994	6.33976
GOTERM_BP_DIRECT	GO:0048704~embryonic skeletal system morphogenesis	7	0.876095	0.00312335	424139, 777548, 395633, 429940, 771214, 425096, 396230	448	30	8994	4.68438
GOTERM_BP_DIRECT	GO:0002250~adaptive immune response	7	0.876095	0.00371365	404271, 396092, 107049337, 100859032, 396396, 100857744, 100858177	448	31	8994	4.53327
GOTERM_BP_DIRECT	GO:0006357~regulation of transcription from RNA polymerase II promoter	19	2.37797	0.00481551	426623, 395146, 100857480, 769489, 428796, 426284, 396073, 395865, 427458, 396482, 427790, 422017, 423985, 374067, 421737, 395519, 395952, 396235, 395693	448	185	8994	2.06185
GOTERM_BP_DIRECT	GO:0045944~positive regulation of transcription from RNA polymerase II promoter	32	4.00501	0.00748003	426623, 426185, 415453, 396301, 424044, 769489, 395570, 426284, 396230, 420986, 107055370, 396342, 422979, 777133, 107055420, 415307, 776856, 395146, 425610, 395865, 422720, 426361, 395812, 396482, 419571, 419369, 101749375, 395519, 395633, 419265, 395952, 771214	448	395	8994	1.6264
GOTERM_BP_DIRECT	GO:0006260~DNA replication	8	1.00125	0.0137792	415307, 424958, 419053, 395570, 416628, 425297, 425530, 418514	448	52	8994	3.0886
GOTERM_BP_DIRECT	GO:0019221~cytokine-mediated signaling pathway	8	1.00125	0.015219	395219, 429084, 107049337, 421507, 100859032, 428552, 100857744, 100858177	448	53	8994	3.03032
GOTERM_BP_DIRECT	GO:0043330~response to exogenous dsRNA	5	0.625782	0.0183696	107049337, 100859032, 100857744, 100858177, 422720	448	21	8994	4.77997
GOTERM_BP_DIRECT	GO:0042100~B cell proliferation	5	0.625782	0.0183696	107049337, 100859032, 100857744, 395865, 100858177	448	21	8994	4.77997
GOTERM_BP_DIRECT	GO:0043983~histone H4-K12 acetylation	3	0.375469	0.0222978	419617, 418674, 425530	448	5	8994	12.0455
GOTERM_BP_DIRECT	GO:0002323~natural killer cell activation involved in immune response	4	0.500626	0.0240246	107049337, 100859032, 100857744, 100858177	448	13	8994	6.1772
GOTERM_BP_DIRECT	GO:0009953~dorsal/ventral pattern formation	5	0.625782	0.0251409	374272, 419165, 429940, 395865, 420854	448	23	8994	4.36432
GOTERM_BP_DIRECT	GO:0000122~negative regulation of transcription from RNA polymerase II promoter	22	2.75344	0.0275675	415307, 408082, 770153, 396301, 374093, 426284, 395865, 416113, 426314, 396119, 396230, 395281, 419571, 427790, 101749375, 416650, 420154, 107055370, 374213, 387330, 107055420, 420854	448	270	8994	1.63581
GOTERM_BP_DIRECT	GO:0033141~positive regulation of peptidyl-serine phosphorylation of STAT protein	4	0.500626	0.0294735	107049337, 100859032, 100857744, 100858177	448	14	8994	5.73597
GOTERM_BP_DIRECT	GO:0045087~innate immune response	11	1.37672	0.029851	422131, 404271, 777583, 396482, 107049337, 100859032, 425013, 396396, 100857744, 100858177, 422720	448	102	8994	2.16505
GOTERM_BP_DIRECT	GO:0006334~nucleosome assembly	7	0.876095	0.0305261	769973, 100113359, 416890, 417954, 417956, 418514, 417957	448	48	8994	2.92773
GOTERM_BP_DIRECT	GO:0007275~multicellular organism development	16	2.0025	0.0314637	424139, 423196, 395868, 395788, 395274, 395266, 423305, 396230, 395812, 396045, 777548, 396342, 387330, 771214, 424707, 425096	448	178	8994	1.80457
GOTERM_BP_DIRECT	GO:0043065~positive regulation of apoptotic process	10	1.25156	0.0410132	374272, 419759, 395236, 396432, 374058, 101748881, 395570, 395844, 395274, 395693	448	93	8994	2.1587
GOTERM_BP_DIRECT	GO:0002286~T cell activation involved in immune response	4	0.500626	0.0421438	107049337, 100859032, 100857744, 100858177	448	16	8994	5.01897
GOTERM_BP_DIRECT	GO:0043982~histone H4-K8 acetylation	3	0.375469	0.0438306	419617, 418674, 425530	448	7	8994	8.60395
GOTERM_BP_DIRECT	GO:0043981~histone H4-K5 acetylation	3	0.375469	0.0438306	419617, 418674, 425530	448	7	8994	8.60395
GOTERM_BP_DIRECT	GO:0006355~regulation of transcription, DNA-templated	27	3.37922	0.0457125	424139, 424845, 416158, 374240, 374093, 421948, 395590, 419617, 395591, 100431103, 416224, 425096, 418514, 395769, 420669, 395868, 425630, 395788, 395813, 395812, 777548, 387330, 396235, 771214, 107056006, 776034, 419453	448	370	8994	1.465
GOTERM_BP_DIRECT	GO:0032496~response to lipopolysaccharide	7	0.876095	0.0465171	100857635, 396482, 424705, 422511, 107055370, 416302, 395274	448	53	8994	2.65153
GOTERM_BP_DIRECT	GO:0051607~defense response to virus	7	0.876095	0.0465171	107049337, 100859032, 418200, 100857744, 101750245, 100858177, 422720	448	53	8994	2.65153
GOTERM_BP_DIRECT	GO:0098609~cell-cell adhesion	5	0.625782	0.0479081	428552, 419307, 417554, 419190, 395202	448	28	8994	3.58498
GOTERM_BP_DIRECT	GO:0007507~heart development	10	1.25156	0.0541966	374077, 395281, 374157, 421622, 428552, 374213, 420022, 396073, 423892, 420854	448	98	8994	2.04856
GOTERM_BP_DIRECT	GO:0016446~somatic hypermutation of immunoglobulin genes	3	0.375469	0.0565536	421291, 378799, 418257	448	8	8994	7.52846
GOTERM_BP_DIRECT	GO:0002437~inflammatory response to antigenic stimulus	3	0.375469	0.0565536	396482, 423290, 771801	448	8	8994	7.52846
GOTERM_BP_DIRECT	GO:0006351~transcription, DNA-templated	28	3.50438	0.0645986	424139, 425709, 424044, 769489, 374240, 374093, 426314, 396230, 395281, 396045, 419617, 107055370, 425096, 418514, 395146, 420669, 424657, 395788, 395813, 396482, 395812, 777548, 424702, 387330, 771214, 396235, 776034, 419453	448	401	8994	1.40181
GOTERM_BP_DIRECT	GO:0010569~regulation of double-strand break repair via homologous recombination	3	0.375469	0.0703742	419571, 429028, 431296	448	9	8994	6.69196
GOTERM_BP_DIRECT	GO:0006885~regulation of pH	3	0.375469	0.0703742	408082, 419580, 420854	448	9	8994	6.69196
GOTERM_BP_DIRECT	GO:0045190~isotype switching	3	0.375469	0.0851522	421291, 378799, 418257	448	10	8994	6.02277
GOTERM_BP_DIRECT	GO:0001947~heart looping	5	0.625782	0.0862669	422083, 395812, 419165, 395844, 396313	448	34	8994	2.95234
GOTERM_BP_DIRECT	GO:0030183~B cell differentiation	5	0.625782	0.0862669	107049337, 100859032, 100857744, 378799, 100858177	448	34	8994	2.95234
GOTERM_BP_DIRECT	GO:0001756~somitogenesis	5	0.625782	0.0862669	417104, 418455, 395633, 395788, 395865	448	34	8994	2.95234
GOTERM_BP_DIRECT	GO:0045893~positive regulation of transcription, DNA-templated	15	1.87735	0.0877086	425709, 100529062, 423196, 419759, 416181, 100859279, 395865, 429784, 420284, 421948, 396045, 396342, 396235, 396313, 427310	448	189	8994	1.59332
GOTERM_BP_DIRECT	GO:0007265~Ras protein signal transduction	4	0.500626	0.0932878	426623, 423290, 396389, 425068	448	22	8994	3.65016
GOTERM_BP_DIRECT	GO:0016337~single organismal cell-cell adhesion	5	0.625782	0.0937721	419707, 421234, 424752, 396389, 425302	448	35	8994	2.86798
GOTERM_BP_DIRECT	GO:0000710~meiotic mismatch repair	2	0.250313	0.0969348	421291, 378799	448	2	8994	20.0759
GOTERM_BP_DIRECT	GO:0001560~regulation of cell growth by extracellular stimulus	2	0.250313	0.0969348	427790, 423489	448	2	8994	20.0759
GOTERM_BP_DIRECT	GO:0071895~odontoblast differentiation	2	0.250313	0.0969348	395590, 395865	448	2	8994	20.0759
GOTERM_BP_DIRECT	GO:0019240~citrulline biosynthetic process	2	0.250313	0.0969348	395735, 423976	448	2	8994	20.0759

## Sheet: cluster 4
Category	Term	Count	%	PValue	Genes	List Total	Pop Hits	Pop Total	Fold Enrichment
GOTERM_BP_DIRECT	GO:0006281~DNA repair	14	1.87668	0.000360915	416440, 395449, 422505, 427468, 395228, 422104, 374246, 418092, 424291, 395555, 723780, 421202, 422788, 424777	431	91	8994	3.21042
GOTERM_BP_DIRECT	GO:0042384~cilium assembly	13	1.74263	0.00038231	422433, 417904, 418578, 427367, 422949, 425108, 418070, 428553, 418433, 416684, 424039, 425392, 771364	431	80	8994	3.39101
GOTERM_BP_DIRECT	GO:0019827~stem cell population maintenance	8	1.07239	0.000646073	419783, 418572, 423035, 425350, 420940, 395188, 395174, 422703	431	32	8994	5.21694
GOTERM_BP_DIRECT	GO:0090502~RNA phosphodiester bond hydrolysis, endonucleolytic	5	0.670241	0.00187658	423437, 424795, 420911, 415294, 768362	431	12	8994	8.6949
GOTERM_BP_DIRECT	GO:0051301~cell division	11	1.47453	0.00233789	427473, 426366, 424347, 386582, 374047, 396156, 431608, 424873, 423970, 396413, 415631	431	73	8994	3.14446
GOTERM_BP_DIRECT	GO:0006302~double-strand break repair	7	0.938338	0.00257179	423403, 374246, 418326, 422505, 768913, 420286, 422104	431	30	8994	4.86914
GOTERM_BP_DIRECT	GO:0007099~centriole replication	4	0.536193	0.00328812	424471, 422746, 424873, 422497	431	7	8994	11.9244
GOTERM_BP_DIRECT	GO:0031054~pre-miRNA processing	4	0.536193	0.00328812	423437, 428222, 424795, 420911	431	7	8994	11.9244
GOTERM_BP_DIRECT	GO:0000724~double-strand break repair via homologous recombination	9	1.20643	0.00341038	374246, 421951, 395449, 421799, 417596, 395555, 768913, 431608, 395188	431	53	8994	3.54358
GOTERM_BP_DIRECT	GO:0031297~replication fork processing	5	0.670241	0.00351638	421799, 422505, 424291, 422549, 422104	431	14	8994	7.45277
GOTERM_BP_DIRECT	GO:0016569~covalent chromatin modification	6	0.80429	0.00487667	421140, 386582, 723780, 426381, 395390, 420839	431	24	8994	5.21694
GOTERM_BP_DIRECT	GO:0010501~RNA secondary structure unwinding	6	0.80429	0.00823407	419783, 416312, 427759, 428222, 395629, 417660	431	27	8994	4.63728
GOTERM_BP_DIRECT	GO:0006355~regulation of transcription, DNA-templated	29	3.8874	0.0105832	396171, 396096, 100859435, 420759, 420630, 421140, 100859497, 396205, 723780, 771636, 419917, 373934, 421790, 424756, 424496, 427425, 418596, 426381, 395122, 419478, 395576, 417801, 425543, 395517, 423035, 418955, 423709, 421193, 427148	431	370	8994	1.63558
GOTERM_BP_DIRECT	GO:0045132~meiotic chromosome segregation	3	0.402145	0.0128312	420650, 396156, 395189	431	4	8994	15.6508
GOTERM_BP_DIRECT	GO:0030422~production of siRNA involved in RNA interference	3	0.402145	0.0128312	423437, 424795, 420911	431	4	8994	15.6508
GOTERM_BP_DIRECT	GO:0007095~mitotic G2 DNA damage checkpoint	4	0.536193	0.0134343	374246, 420694, 101752182, 395555	431	11	8994	7.58827
GOTERM_BP_DIRECT	GO:0006417~regulation of translation	5	0.670241	0.0135629	419783, 426366, 420508, 395905, 768824	431	20	8994	5.21694
GOTERM_BP_DIRECT	GO:0071480~cellular response to gamma radiation	4	0.536193	0.0172868	396171, 422505, 424777, 424222	431	12	8994	6.95592
GOTERM_BP_DIRECT	GO:0045892~negative regulation of transcription, DNA-templated	15	2.01072	0.0180054	419155, 424780, 100858086, 423017, 395390, 374071, 420839, 424222, 420047, 386582, 425280, 418955, 768824, 395357, 424571	431	157	8994	1.99373
GOTERM_BP_DIRECT	GO:0006303~double-strand break repair via nonhomologous end joining	4	0.536193	0.0216901	418593, 395555, 420729, 424222	431	13	8994	6.42085
GOTERM_BP_DIRECT	GO:0032467~positive regulation of cytokinesis	4	0.536193	0.0266466	416984, 424347, 424519, 395442	431	14	8994	5.96221
GOTERM_BP_DIRECT	GO:0016578~histone deubiquitination	3	0.402145	0.0300944	416440, 421193, 420275	431	6	8994	10.4339
GOTERM_BP_DIRECT	GO:0006357~regulation of transcription from RNA polymerase II promoter	16	2.14477	0.0315005	100858851, 424780, 423017, 374127, 100858113, 395229, 420275, 420828, 421854, 386582, 418070, 426047, 419264, 395629, 416677, 772393	431	185	8994	1.80478
GOTERM_BP_DIRECT	GO:0051321~meiotic cell cycle	3	0.402145	0.040817	374246, 395555, 771137	431	7	8994	8.94332
GOTERM_BP_DIRECT	GO:0006351~transcription, DNA-templated	28	3.75335	0.0447365	396171, 424780, 396096, 420630, 395390, 374071, 420839, 421140, 396205, 386582, 723780, 420206, 373934, 421790, 424756, 424496, 431605, 424750, 427425, 426381, 395122, 374127, 395124, 386585, 395271, 418955, 431212, 427148	431	401	8994	1.4571
GOTERM_BP_DIRECT	GO:0031146~SCF-dependent proteasomal ubiquitin-dependent protein catabolic process	4	0.536193	0.0447953	424347, 431586, 776097, 418001	431	17	8994	4.91006
GOTERM_BP_DIRECT	GO:0000723~telomere maintenance	4	0.536193	0.0447953	374246, 395122, 378896, 424222	431	17	8994	4.91006
GOTERM_BP_DIRECT	GO:0009411~response to UV	4	0.536193	0.051907	427153, 424291, 416114, 422549	431	18	8994	4.63728
GOTERM_BP_DIRECT	GO:0033674~positive regulation of kinase activity	3	0.402145	0.0527308	374246, 373901, 395555	431	8	8994	7.82541
GOTERM_BP_DIRECT	GO:0016446~somatic hypermutation of immunoglobulin genes	3	0.402145	0.0527308	101752182, 418326, 420729	431	8	8994	7.82541
GOTERM_BP_DIRECT	GO:0042733~embryonic digit morphogenesis	6	0.80429	0.0528537	419059, 425108, 428553, 421365, 395615, 373986	431	43	8994	2.91178
GOTERM_BP_DIRECT	GO:0032508~DNA duplex unwinding	4	0.536193	0.059527	374246, 422505, 421790, 424222	431	19	8994	4.39321
GOTERM_BP_DIRECT	GO:0006396~RNA processing	5	0.670241	0.0644173	419172, 424773, 420911, 428349, 417218	431	32	8994	3.26059
GOTERM_BP_DIRECT	GO:0007076~mitotic chromosome condensation	3	0.402145	0.0656981	396156, 395189, 423213	431	9	8994	6.95592
GOTERM_BP_DIRECT	GO:0000077~DNA damage checkpoint	4	0.536193	0.0676383	426083, 421374, 424873, 424777	431	20	8994	4.17355
GOTERM_BP_DIRECT	GO:0000086~G2/M transition of mitotic cell cycle	4	0.536193	0.076222	430534, 768913, 416583, 374071	431	21	8994	3.97481
GOTERM_BP_DIRECT	GO:2000781~positive regulation of double-strand break repair	2	0.268097	0.0933386	430534, 423858	431	2	8994	20.8677
GOTERM_BP_DIRECT	GO:0051383~kinetochore organization	2	0.268097	0.0933386	396156, 395189	431	2	8994	20.8677
GOTERM_BP_DIRECT	GO:0060733~regulation of eIF2 alpha phosphorylation by amino acid starvation	2	0.268097	0.0933386	421080, 423285	431	2	8994	20.8677
GOTERM_BP_DIRECT	GO:0001302~replicative cell aging	2	0.268097	0.0933386	422505, 768913	431	2	8994	20.8677
GOTERM_BP_DIRECT	GO:0021997~neural plate axis specification	2	0.268097	0.0933386	419059, 395806	431	2	8994	20.8677
GOTERM_BP_DIRECT	GO:0008589~regulation of smoothened signaling pathway	3	0.402145	0.0942931	419059, 418433, 425392	431	11	8994	5.6912

## Sheet: cluster 5
Category	Term	Count	%	PValue	Genes	List Total	Pop Hits	Pop Total	Fold Enrichment
GOTERM_BP_DIRECT	GO:0043122~regulation of I-kappaB kinase/NF-kappaB signaling	3	0.78329	0.009415	416588, 374079, 423854	199	7	8994	19.3697
GOTERM_BP_DIRECT	GO:0003323~type B pancreatic cell development	3	0.78329	0.0123725	416588, 395820, 395949	199	8	8994	16.9485
GOTERM_BP_DIRECT	GO:0019882~antigen processing and presentation	4	1.04439	0.0151316	100859408, 417050, 427746, 427737	199	24	8994	7.53266
GOTERM_BP_DIRECT	GO:0044804~nucleophagy	3	0.78329	0.0193173	420018, 417339, 404750	199	10	8994	13.5588
GOTERM_BP_DIRECT	GO:0007030~Golgi organization	5	1.30548	0.0271223	417024, 428328, 426843, 417378, 415681	199	52	8994	4.34577
GOTERM_BP_DIRECT	GO:0009954~proximal/distal pattern formation	3	0.78329	0.0320675	395964, 395820, 423189	199	13	8994	10.4298
GOTERM_BP_DIRECT	GO:0006955~immune response	7	1.82768	0.0329887	425256, 416923, 417838, 417050, 395914, 395090, 769958	199	109	8994	2.90249
GOTERM_BP_DIRECT	GO:0002052~positive regulation of neuroblast proliferation	3	0.78329	0.0368792	395964, 395949, 554220	199	14	8994	9.68485
GOTERM_BP_DIRECT	GO:0042921~glucocorticoid receptor signaling pathway	2	0.522193	0.0435471	415406, 416955	199	2	8994	45.196
GOTERM_BP_DIRECT	GO:0035567~non-canonical Wnt signaling pathway	3	0.78329	0.04726	395949, 374062, 373887	199	16	8994	8.47425
GOTERM_BP_DIRECT	GO:0032007~negative regulation of TOR signaling	3	0.78329	0.0585631	420162, 423242, 427185	199	18	8994	7.53266
GOTERM_BP_DIRECT	GO:0009411~response to UV	3	0.78329	0.0585631	424358, 422903, 427185	199	18	8994	7.53266
GOTERM_BP_DIRECT	GO:0034080~CENP-A containing nucleosome assembly	2	0.522193	0.0646078	415952, 424689	199	3	8994	30.1307
GOTERM_BP_DIRECT	GO:1904561~cellular response to diphenidol	2	0.522193	0.0646078	101749182, 771663	199	3	8994	30.1307
GOTERM_BP_DIRECT	GO:0072747~cellular response to chloramphenicol	2	0.522193	0.0646078	101749182, 771663	199	3	8994	30.1307
GOTERM_BP_DIRECT	GO:0035023~regulation of Rho protein signal transduction	4	1.04439	0.0682534	425963, 417895, 418940, 373938	199	43	8994	4.20428
GOTERM_BP_DIRECT	GO:0042752~regulation of circadian rhythm	3	0.78329	0.0835461	417378, 378891, 427185	199	22	8994	6.16309
GOTERM_BP_DIRECT	GO:2000052~positive regulation of non-canonical Wnt signaling pathway	2	0.522193	0.085207	417378, 378891	199	4	8994	22.598
GOTERM_BP_DIRECT	GO:1902656~calcium ion import into cytosol	2	0.522193	0.085207	101749182, 771663	199	4	8994	22.598
GOTERM_BP_DIRECT	GO:0048489~synaptic vesicle transport	2	0.522193	0.085207	395964, 415572	199	4	8994	22.598
GOTERM_BP_DIRECT	GO:0050995~negative regulation of lipid catabolic process	2	0.522193	0.085207	107053781, 427185	199	4	8994	22.598
GOTERM_BP_DIRECT	GO:0000045~autophagosome assembly	3	0.78329	0.0902215	420018, 417339, 404750	199	23	8994	5.89513
GOTERM_BP_DIRECT	GO:0009953~dorsal/ventral pattern formation	3	0.78329	0.0902215	395964, 396055, 423189	199	23	8994	5.89513

## Sheet: cluster 6
Category	Term	Count	%	PValue	Genes	List Total	Pop Hits	Pop Total	Fold Enrichment
GOTERM_BP_DIRECT	GO:0009952~anterior/posterior pattern specification	26	1.05562	1.08137e-06	430698, 771246, 395711, 100858404, 100858895, 395327, 425723, 423923, 416939, 395505, 426903, 374147, 396324, 419710, 428513, 373976, 425962, 420769, 768916, 396381, 374138, 395956, 100858368, 427871, 427234, 425919	1522	56	8994	2.74362
GOTERM_BP_DIRECT	GO:0007411~axon guidance	28	1.13683	6.36926e-06	419824, 419825, 100859813, 423401, 395871, 396465, 395155, 395156, 395582, 416074, 425805, 426986, 395822, 373854, 419492, 419106, 420769, 395748, 374142, 420996, 418361, 396513, 373980, 420472, 395956, 428901, 395292, 408046	1522	68	8994	2.43325
GOTERM_BP_DIRECT	GO:0000122~negative regulation of transcription from RNA polymerase II promoter	75	3.04507	7.76576e-06	428158, 493647, 395713, 424452, 395711, 417250, 424356, 426921, 374148, 373915, 395803, 420583, 396341, 427409, 424320, 421380, 419106, 420769, 418574, 427946, 396087, 419832, 723789, 396383, 100859519, 423646, 418420, 420996, 374138, 419388, 420471, 395956, 374207, 420192, 396333, 423328, 395635, 425919, 395858, 422084, 420599, 395302, 374118, 395132, 416092, 395750, 100858895, 420455, 101747322…	1522	270	8994	1.64148
GOTERM_BP_DIRECT	GO:0042384~cilium assembly	31	1.25863	7.80559e-06	423540, 423401, 430829, 418979, 423241, 777441, 416839, 422136, 421983, 771481, 416758, 420224, 417969, 424165, 424495, 429016, 769430, 425014, 420745, 421958, 424210, 421284, 423911, 420092, 421400, 770159, 427351, 423549, 421835, 395204, 424029	1522	80	8994	2.28987
GOTERM_BP_DIRECT	GO:0007224~smoothened signaling pathway	21	0.852619	9.20674e-06	423540, 416274, 425014, 770095, 769516, 420769, 415979, 421284, 421983, 771269, 418053, 771481, 424176, 374138, 418361, 422830, 422851, 419392, 419710, 422460, 417969	1522	44	8994	2.82036
GOTERM_BP_DIRECT	GO:0060173~limb development	17	0.690215	1.63677e-05	374007, 395254, 414745, 420769, 418125, 374142, 421983, 395432, 771481, 395643, 374147, 374243, 417679, 395292, 395141, 395150, 373988	1522	32	8994	3.13933
GOTERM_BP_DIRECT	GO:0007420~brain development	24	0.974421	7.96911e-05	395401, 771897, 415481, 423721, 395254, 493647, 395713, 422438, 395155, 417606, 395582, 418125, 100858895, 422491, 424210, 395101, 421983, 429199, 419590, 771481, 395967, 396513, 395376, 422358	1522	61	8994	2.32498
GOTERM_BP_DIRECT	GO:0007507~heart development	33	1.33983	9.72712e-05	395401, 420599, 395254, 431654, 395278, 422210, 378890, 771481, 101747322, 423990, 417576, 416758, 373974, 416939, 420269, 422830, 421725, 420482, 408032, 418000, 424790, 396085, 419106, 418574, 420769, 418125, 427262, 395956, 395292, 421116, 373988, 395973, 395376	1522	98	8994	1.98988
GOTERM_BP_DIRECT	GO:0045893~positive regulation of transcription, DNA-templated	52	2.11125	0.000295151	418024, 395713, 420232, 421009, 417712, 418935, 395327, 428414, 415900, 771259, 417887, 427267, 419106, 396105, 396381, 426789, 419388, 395479, 395956, 422827, 373988, 374179, 395235, 395177, 395237, 416092, 100859599, 100858895, 418560, 428435, 415834, 395309, 101747322, 418967, 395682, 408035, 415481, 769516, 422439, 426483, 421301, 430336, 503512, 422024, 424997, 374061, 416667, 418148, 427212…	1522	189	8994	1.62585
GOTERM_BP_DIRECT	GO:0001658~branching involved in ureteric bud morphogenesis	13	0.527812	0.000311749	395166, 395718, 395235, 420769, 693262, 395327, 101747322, 395505, 374148, 421697, 419073, 374018, 395569	1522	25	8994	3.07285
GOTERM_BP_DIRECT	GO:0006355~regulation of transcription, DNA-templated	88	3.57288	0.000553812	395718, 395713, 420232, 419390, 418065, 418935, 423068, 417804, 395328, 386575, 425723, 395327, 423923, 771008, 396387, 395942, 395803, 415962, 429283, 395904, 421102, 771676, 396142, 423315, 418531, 395705, 771259, 396082, 724086, 374185, 395864, 776143, 419207, 374080, 423559, 417387, 374103, 768916, 396382, 429400, 425989, 419388, 395574, 373941, 395573, 100859138, 395851, 395635, 395377, 7720…	1522	370	8994	1.40546
GOTERM_BP_DIRECT	GO:0007389~pattern specification process	9	0.365408	0.000752238	395718, 419073, 693262, 373988, 395790, 374103, 396053, 396029, 396381	1522	14	8994	3.79885
GOTERM_BP_DIRECT	GO:0045944~positive regulation of transcription from RNA polymerase II promoter	92	3.73528	0.000842366	395253, 395718, 423541, 418216, 428158, 771246, 395713, 100858556, 100858404, 417891, 424356, 396053, 423302, 419785, 424289, 422778, 374147, 420269, 374148, 430409, 395942, 373915, 418456, 416383, 429484, 419254, 419392, 418727, 419710, 395569, 419208, 419106, 420769, 374252, 396383, 395432, 417639, 396043, 396105, 423646, 423796, 395811, 421928, 420471, 374207, 395631, 417643, 395573, 373940, 1…	1522	395	8994	1.37635
GOTERM_BP_DIRECT	GO:0008045~motor neuron axon guidance	9	0.365408	0.00137396	395705, 373940, 416092, 396397, 395825, 395559, 408046, 373967, 396381	1522	15	8994	3.5456
GOTERM_BP_DIRECT	GO:0006338~chromatin remodeling	15	0.609013	0.00138193	422331, 420647, 419106, 426483, 430336, 396004, 100858895, 768916, 417656, 554283, 374148, 395942, 374207, 419435, 424671	1522	36	8994	2.46222
GOTERM_BP_DIRECT	GO:0035058~nonmotile primary cilium assembly	10	0.406009	0.00201261	425014, 423644, 426903, 422830, 415318, 421284, 100859489, 771481, 100859633, 395204	1522	19	8994	3.11017
GOTERM_BP_DIRECT	GO:0006351~transcription, DNA-templated	91	3.69468	0.00208974	395253, 395718, 422384, 428158, 493647, 395711, 100858404, 419390, 395328, 386575, 425723, 395327, 424289, 417656, 373990, 374148, 395942, 373915, 416383, 374146, 418636, 419392, 396341, 395904, 424309, 421102, 396142, 423315, 396082, 421380, 419208, 420769, 395104, 374103, 396105, 100859519, 395679, 420471, 395956, 395479, 374207, 395574, 100859138, 373940, 395573, 395670, 423328, 395635, 373989…	1522	401	8994	1.34102
GOTERM_BP_DIRECT	GO:0050679~positive regulation of epithelial cell proliferation	13	0.527812	0.00226951	395718, 420996, 395237, 395655, 374148, 420427, 422094, 416092, 416117, 396308, 497270, 396053, 772070	1522	30	8994	2.56071
GOTERM_BP_DIRECT	GO:0035019~somatic stem cell population maintenance	11	0.44661	0.00252439	374168, 426903, 395237, 396082, 374148, 419388, 418456, 395631, 418764, 395432, 419785	1522	23	8994	2.8262
GOTERM_BP_DIRECT	GO:0090630~activation of GTPase activity	17	0.690215	0.00254419	420646, 428099, 419104, 422534, 416282, 100859599, 423395, 768712, 428062, 428128, 417673, 428012, 417643, 415364, 421900, 423327, 424687	1522	46	8994	2.18388
GOTERM_BP_DIRECT	GO:0032332~positive regulation of chondrocyte differentiation	8	0.324807	0.00259605	419533, 418195, 374148, 396030, 420769, 395132, 395327, 395453	1522	13	8994	3.63651
GOTERM_BP_DIRECT	GO:0090090~negative regulation of canonical Wnt signaling pathway	22	0.89322	0.00260595	395234, 769516, 419492, 414745, 420769, 723789, 418939, 417173, 396383, 415729, 374148, 395655, 395545, 395508, 415725, 395573, 421813, 420701, 419377, 425375, 427234, 432368	1522	67	8994	1.94038
GOTERM_BP_DIRECT	GO:0060041~retina development in camera-type eye	12	0.487211	0.00289643	416758, 417839, 396465, 396082, 373980, 395321, 396030, 423061, 420974, 419402, 419377, 751791	1522	27	8994	2.62637
GOTERM_BP_DIRECT	GO:0007368~determination of left/right symmetry	13	0.527812	0.00314141	424790, 415409, 418979, 431654, 395432, 421400, 417576, 416758, 422830, 420482, 421725, 396324, 421023	1522	31	8994	2.47811
GOTERM_BP_DIRECT	GO:0001755~neural crest cell migration	16	0.649614	0.00332309	415932, 415298, 420115, 395871, 374109, 424248, 396383, 425087, 428340, 396035, 374089, 374148, 395573, 395825, 427871, 395569	1522	43	8994	2.19882
GOTERM_BP_DIRECT	GO:0006357~regulation of transcription from RNA polymerase II promoter	47	1.90824	0.00349174	422053, 423541, 422999, 395302, 396110, 416857, 416092, 395750, 771481, 101747322, 769918, 419233, 417656, 430409, 395508, 374146, 418636, 417679, 428513, 424309, 423315, 420647, 427757, 426153, 417919, 420607, 416421, 422439, 419832, 395748, 421428, 425111, 396129, 420092, 424176, 422820, 420471, 418646, 395631, 415401, 418521, 419723, 425840, 419341, 427351, 374017, 427182	1522	185	8994	1.50129
GOTERM_BP_DIRECT	GO:0090103~cochlea morphogenesis	9	0.365408	0.00377606	395718, 395871, 426903, 374148, 395545, 395956, 693262, 396029, 374061	1522	17	8994	3.12847
GOTERM_BP_DIRECT	GO:0001764~neuron migration	19	0.771417	0.00468607	417371, 419825, 422616, 421498, 396465, 424320, 415318, 419106, 428446, 395278, 422491, 423682, 422672, 395966, 395572, 421687, 100859633, 395204, 396294	1522	57	8994	1.96978
GOTERM_BP_DIRECT	GO:0035909~aorta morphogenesis	6	0.243605	0.00490178	395718, 373990, 395713, 422523, 693262, 396043	1522	8	8994	4.432
GOTERM_BP_DIRECT	GO:0001759~organ induction	7	0.284206	0.00494174	430698, 417845, 693262, 395432, 395327, 395569, 396516	1522	11	8994	3.76048
GOTERM_BP_DIRECT	GO:0018105~peptidyl-serine phosphorylation	25	1.01502	0.00607895	769291, 395928, 421478, 423241, 100857144, 416713, 423302, 423778, 420130, 417101, 421597, 427844, 771961, 427267, 418595, 423098, 374252, 422473, 427447, 419455, 374138, 101751124, 374018, 395376, 421497	1522	85	8994	1.73804
GOTERM_BP_DIRECT	GO:0031338~regulation of vesicle fusion	10	0.406009	0.00669824	417673, 420646, 428012, 422534, 419104, 415364, 416282, 768712, 428062, 428128	1522	22	8994	2.68606
GOTERM_BP_DIRECT	GO:0045880~positive regulation of smoothened signaling pathway	8	0.324807	0.00712253	425014, 395237, 418979, 373941, 422851, 422494, 424210, 421983	1522	15	8994	3.15164
GOTERM_BP_DIRECT	GO:0030324~lung development	14	0.568413	0.00733902	395254, 395302, 420769, 396308, 770043, 423789, 395453, 424969, 420269, 395655, 395956, 374135, 373988, 418000	1522	38	8994	2.17712
GOTERM_BP_DIRECT	GO:0060021~palate development	18	0.730816	0.00748842	418574, 420769, 396308, 421983, 425026, 771481, 374168, 373990, 396513, 419388, 421697, 373941, 772070, 427871, 373976, 431604, 432368, 419097	1522	55	8994	1.93396
GOTERM_BP_DIRECT	GO:0007275~multicellular organism development	44	1.78644	0.00797369	395235, 395718, 395234, 427937, 395237, 421009, 395119, 395711, 396110, 374118, 395307, 100858404, 101751203, 395328, 423068, 373974, 771008, 422209, 395545, 428513, 373935, 418849, 420319, 396082, 395864, 421303, 374142, 395101, 429040, 396382, 415845, 374061, 423292, 419882, 395956, 418954, 373941, 373905, 396314, 419341, 395377, 374204, 420856, 395083	1522	178	8994	1.46073
GOTERM_BP_DIRECT	GO:0042733~embryonic digit morphogenesis	15	0.609013	0.00893842	430698, 769516, 420769, 422494, 395278, 396308, 427262, 395327, 374168, 373990, 395956, 421725, 424141, 373976, 424029	1522	43	8994	2.06139
GOTERM_BP_DIRECT	GO:0035023~regulation of Rho protein signal transduction	15	0.609013	0.00893842	424842, 771897, 421632, 418506, 422247, 424085, 418761, 420135, 420172, 418748, 418940, 416000, 417941, 421900, 418781	1522	43	8994	2.06139
GOTERM_BP_DIRECT	GO:0050872~white fat cell differentiation	5	0.203004	0.00915892	423646, 419388, 422904, 395432, 432368	1522	6	8994	4.92444
GOTERM_BP_DIRECT	GO:0035721~intraciliary retrograde transport	5	0.203004	0.00915892	424176, 416758, 430829, 418979, 421958	1522	6	8994	4.92444
GOTERM_BP_DIRECT	GO:0072178~nephric duct morphogenesis	5	0.203004	0.00915892	395967, 419106, 395574, 395559, 396381	1522	6	8994	4.92444
GOTERM_BP_DIRECT	GO:0007519~skeletal muscle tissue development	10	0.406009	0.00938143	424289, 423320, 769935, 395942, 771246, 396085, 416092, 693262, 408032, 418000	1522	23	8994	2.56927
GOTERM_BP_DIRECT	GO:0021987~cerebral cortex development	11	0.44661	0.00975621	395166, 421564, 396375, 769935, 414745, 396085, 415318, 426802, 419710, 427688, 419097	1522	27	8994	2.4075
GOTERM_BP_DIRECT	GO:0007157~heterophilic cell-cell adhesion via plasma membrane cell adhesion molecules	8	0.324807	0.0108397	395166, 373854, 424980, 414745, 424402, 422557, 419073, 418425	1522	16	8994	2.95466
GOTERM_BP_DIRECT	GO:0045892~negative regulation of transcription, DNA-templated	39	1.58343	0.0117307	420599, 423541, 395237, 395713, 396110, 374191, 418957, 416074, 396397, 374150, 396070, 101747322, 415902, 420701, 772083, 417774, 417919, 395864, 420769, 419106, 396087, 426483, 396383, 422024, 396029, 424997, 395740, 396381, 419533, 426789, 430917, 374207, 373905, 414880, 422827, 427351, 415738, 419286, 428332	1522	157	8994	1.46792
GOTERM_BP_DIRECT	GO:0048286~lung alveolus development	9	0.365408	0.012184	374147, 769935, 419587, 421697, 427566, 426986, 420792, 420583, 100858404	1522	20	8994	2.6592
GOTERM_BP_DIRECT	GO:0045669~positive regulation of osteoblast differentiation	13	0.527812	0.0122988	395679, 374147, 396030, 420769, 416892, 396324, 395278, 396308, 374018, 415315, 396412, 396043, 423302	1522	36	8994	2.13392
GOTERM_BP_DIRECT	GO:0048013~ephrin receptor signaling pathway	10	0.406009	0.0128022	423255, 396416, 395967, 396513, 418727, 396402, 418308, 395559, 107054794, 396294	1522	24	8994	2.46222
GOTERM_BP_DIRECT	GO:0030162~regulation of proteolysis	7	0.284206	0.0135263	417724, 416026, 425528, 428313, 421429, 423471, 427688	1522	13	8994	3.18195
GOTERM_BP_DIRECT	GO:0001657~ureteric bud development	8	0.324807	0.0157843	395679, 395237, 395132, 396129, 396516, 373967, 396381, 101747322	1522	17	8994	2.78086
GOTERM_BP_DIRECT	GO:0030705~cytoskeleton-dependent intracellular transport	6	0.243605	0.0163827	100859813, 420832, 420472, 419449, 419284, 408046	1522	10	8994	3.5456
GOTERM_BP_DIRECT	GO:0003273~cell migration involved in endocardial cushion formation	4	0.162404	0.0168685	395655, 771557, 419073, 432368	1522	4	8994	5.90933
GOTERM_BP_DIRECT	GO:0050798~activated T cell proliferation	4	0.162404	0.0168685	420647, 417181, 418308, 396294	1522	4	8994	5.90933
GOTERM_BP_DIRECT	GO:0030900~forebrain development	10	0.406009	0.0170685	416274, 422331, 395966, 395655, 419492, 426986, 418979, 417845, 423682, 396294	1522	25	8994	2.36373
GOTERM_BP_DIRECT	GO:0032495~response to muramyl dipeptide	5	0.203004	0.0185235	427756, 395655, 430409, 431583, 396043	1522	7	8994	4.22095
GOTERM_BP_DIRECT	GO:0032092~positive regulation of protein binding	13	0.527812	0.0192231	396416, 420549, 374138, 396493, 395508, 422882, 418761, 723789, 418308, 418000, 427844, 425375, 416124	1522	38	8994	2.02161
GOTERM_BP_DIRECT	GO:0035556~intracellular signal transduction	48	1.94884	0.0196802	769506, 769291, 395928, 424049, 423428, 420029, 768482, 418493, 428437, 418736, 770911, 776273, 418605, 423302, 420130, 770341, 418748, 769193, 396227, 100859339, 421658, 416956, 421020, 428460, 771897, 424114, 772367, 427267, 771961, 422247, 416876, 423098, 418761, 416401, 422473, 107049311, 423557, 415805, 420135, 420195, 422273, 420792, 416730, 431670, 101751124, 416000, 424155, 421497	1522	208	8994	1.36369
GOTERM_BP_DIRECT	GO:0030010~establishment of cell polarity	7	0.284206	0.0203411	100859813, 374168, 421498, 423098, 770196, 423924, 427447	1522	14	8994	2.95466
GOTERM_BP_DIRECT	GO:0001756~somitogenesis	12	0.487211	0.0204257	395401, 769516, 395574, 100859138, 395132, 428065, 396308, 418125, 421069, 395559, 418000, 395376	1522	34	8994	2.08565
GOTERM_BP_DIRECT	GO:0048704~embryonic skeletal system morphogenesis	11	0.44661	0.0214891	395718, 425962, 771246, 493647, 420769, 100858404, 427871, 425919, 425723, 373976, 396029	1522	30	8994	2.16675
GOTERM_BP_DIRECT	GO:0042472~inner ear morphogenesis	11	0.44661	0.0214891	771897, 769516, 396513, 395572, 419106, 373941, 421775, 374103, 772070, 429199, 396516	1522	30	8994	2.16675
GOTERM_BP_DIRECT	GO:0007018~microtubule-based movement	14	0.568413	0.021874	428572, 420832, 417692, 415488, 424151, 420472, 419449, 415793, 423461, 419284, 427156, 417314, 428510, 408046	1522	43	8994	1.92397
GOTERM_BP_DIRECT	GO:0048589~developmental growth	8	0.324807	0.0221372	395956, 420769, 419106, 423724, 395573, 395132, 396308, 395327	1522	18	8994	2.62637
GOTERM_BP_DIRECT	GO:0030326~embryonic limb morphogenesis	10	0.406009	0.0222848	395505, 430829, 771246, 418979, 373941, 373988, 396502, 427871, 772070, 396516	1522	26	8994	2.27282
GOTERM_BP_DIRECT	GO:0045599~negative regulation of fat cell differentiation	9	0.365408	0.0226094	423646, 420269, 428158, 378919, 419106, 395132, 426929, 101751203, 396043	1522	22	8994	2.41745
GOTERM_BP_DIRECT	GO:0010629~negative regulation of gene expression	19	0.771417	0.0229752	395928, 418874, 415318, 107049317, 395491, 395278, 374080, 416117, 429951, 374173, 425026, 395470, 100858343, 429484, 418803, 374135, 395941, 396294, 420407	1522	66	8994	1.70117
GOTERM_BP_DIRECT	GO:0045665~negative regulation of neuron differentiation	12	0.487211	0.0253644	395505, 419825, 396082, 419497, 374243, 420769, 416074, 421069, 420804, 396383, 396105, 396043	1522	35	8994	2.02606
GOTERM_BP_DIRECT	GO:0061512~protein localization to cilium	6	0.243605	0.0259168	424176, 416758, 420745, 421725, 421658, 421958	1522	11	8994	3.22327
GOTERM_BP_DIRECT	GO:0060045~positive regulation of cardiac muscle cell proliferation	6	0.243605	0.0259168	373990, 395177, 420269, 395655, 373988, 396516	1522	11	8994	3.22327
GOTERM_BP_DIRECT	GO:0048745~smooth muscle tissue development	6	0.243605	0.0259168	769935, 396085, 427254, 771557, 416092, 425026	1522	11	8994	3.22327
GOTERM_BP_DIRECT	GO:0060070~canonical Wnt signaling pathway	16	0.649614	0.0262042	395237, 422210, 418560, 419785, 374061, 374168, 395545, 374243, 395508, 395572, 418456, 396341, 432368, 419097, 100859633, 408035	1522	53	8994	1.78395
GOTERM_BP_DIRECT	GO:0030336~negative regulation of cell migration	15	0.609013	0.0287651	419843, 395237, 414745, 396085, 420232, 416115, 420804, 422740, 769797, 417821, 771557, 395292, 373988, 373935, 415893	1522	49	8994	1.80898
GOTERM_BP_DIRECT	GO:0002088~lens development in camera-type eye	9	0.365408	0.0296643	374243, 417606, 419106, 421725, 418797, 395278, 419710, 429134, 395846	1522	23	8994	2.31235
GOTERM_BP_DIRECT	GO:0050728~negative regulation of inflammatory response	12	0.487211	0.0311133	374212, 771897, 408185, 395221, 419106, 395132, 424315, 395941, 415315, 396383, 395238, 421833	1522	36	8994	1.96978
GOTERM_BP_DIRECT	GO:0070932~histone H3 deacetylation	5	0.203004	0.0321452	420599, 395803, 374207, 419832, 395635	1522	8	8994	3.69333
GOTERM_BP_DIRECT	GO:0044458~motile cilium assembly	5	0.203004	0.0321452	423540, 424626, 422830, 420324, 424969	1522	8	8994	3.69333
GOTERM_BP_DIRECT	GO:0016339~calcium-dependent cell-cell adhesion via plasma membrane cell adhesion molecules	5	0.203004	0.0321452	424980, 416191, 414745, 395119, 428450	1522	8	8994	3.69333
GOTERM_BP_DIRECT	GO:0050678~regulation of epithelial cell proliferation	5	0.203004	0.0321452	772378, 419392, 417845, 395132, 693262	1522	8	8994	3.69333
GOTERM_BP_DIRECT	GO:0070307~lens fiber cell development	5	0.203004	0.0321452	374168, 427937, 396056, 417845, 420519	1522	8	8994	3.69333
GOTERM_BP_DIRECT	GO:0000226~microtubule cytoskeleton organization	11	0.44661	0.0335632	396416, 415614, 419825, 416950, 419528, 416711, 395156, 424345, 422473, 424687, 100859633	1522	32	8994	2.03133
GOTERM_BP_DIRECT	GO:0045444~fat cell differentiation	13	0.527812	0.0345349	423401, 420996, 424320, 395508, 373915, 395713, 420745, 415318, 396341, 418000, 423776, 424515, 771481	1522	41	8994	1.87369
GOTERM_BP_DIRECT	GO:0060271~cilium morphogenesis	10	0.406009	0.0359499	424176, 423540, 417887, 421725, 421693, 428385, 770159, 415979, 421284, 395204	1522	28	8994	2.11047
GOTERM_BP_DIRECT	GO:0072179~nephric duct formation	4	0.162404	0.0368824	419106, 395574, 396129, 396381	1522	5	8994	4.72746
GOTERM_BP_DIRECT	GO:2000096~positive regulation of Wnt signaling pathway, planar cell polarity pathway	4	0.162404	0.0368824	415729, 421813, 417181, 427234	1522	5	8994	4.72746
GOTERM_BP_DIRECT	GO:0048752~semicircular canal morphogenesis	4	0.162404	0.0368824	395718, 420996, 373952, 396029	1522	5	8994	4.72746
GOTERM_BP_DIRECT	GO:0045945~positive regulation of transcription from RNA polymerase III promoter	4	0.162404	0.0368824	419455, 415378, 422165, 420124	1522	5	8994	4.72746
GOTERM_BP_DIRECT	GO:0060831~smoothened signaling pathway involved in dorsal/ventral neural tube patterning	4	0.162404	0.0368824	430829, 395956, 420769, 421725	1522	5	8994	4.72746
GOTERM_BP_DIRECT	GO:0035148~tube formation	4	0.162404	0.0368824	421928, 421498, 395655, 417643	1522	5	8994	4.72746
GOTERM_BP_DIRECT	GO:0043586~tongue development	4	0.162404	0.0368824	419388, 420769, 429040, 431604	1522	5	8994	4.72746
GOTERM_BP_DIRECT	GO:0030308~negative regulation of cell growth	17	0.690215	0.0376112	395177, 395237, 418379, 395331, 395278, 395132, 417229, 374173, 101747322, 423646, 374147, 425209, 395545, 426929, 416010, 396412, 373967	1522	60	8994	1.67431
GOTERM_BP_DIRECT	GO:0048813~dendrite morphogenesis	9	0.365408	0.0380953	420172, 395871, 396035, 419435, 395634, 395825, 427688, 396294, 418781	1522	24	8994	2.216
GOTERM_BP_DIRECT	GO:0048705~skeletal system morphogenesis	9	0.365408	0.0380953	416758, 771797, 420427, 427254, 395711, 373989, 422460, 425026, 415845	1522	24	8994	2.216
GOTERM_BP_DIRECT	GO:0060993~kidney morphogenesis	6	0.243605	0.0383705	426903, 395574, 395569, 396381, 101747322, 423923	1522	12	8994	2.95466
GOTERM_BP_DIRECT	GO:0001822~kidney development	13	0.527812	0.0411636	415408, 395713, 419106, 396065, 396129, 416801, 425026, 101747322, 396381, 422857, 395956, 395574, 424029	1522	42	8994	1.82908
GOTERM_BP_DIRECT	GO:0008543~fibroblast growth factor receptor signaling pathway	10	0.406009	0.0445638	395166, 416274, 419923, 428901, 374135, 417845, 396259, 395432, 396516, 395453	1522	29	8994	2.0377
GOTERM_BP_DIRECT	GO:0008104~protein localization	10	0.406009	0.0445638	100859813, 101750199, 396035, 424085, 426986, 420472, 395195, 100859200, 408046, 771481	1522	29	8994	2.0377
GOTERM_BP_DIRECT	GO:0031532~actin cytoskeleton reorganization	12	0.487211	0.045272	423255, 424842, 418236, 415614, 395871, 418235, 769797, 423098, 428450, 423395, 395432, 427447	1522	38	8994	1.8661
GOTERM_BP_DIRECT	GO:0003151~outflow tract morphogenesis	9	0.365408	0.0479903	395718, 422523, 693262, 771101, 374018, 396502, 416124, 424673, 374061	1522	25	8994	2.12736
GOTERM_BP_DIRECT	GO:0016055~Wnt signaling pathway	17	0.690215	0.0495068	395235, 395234, 427937, 428953, 415408, 419492, 425313, 107049317, 418939, 374142, 374252, 429040, 374168, 395545, 374243, 395572, 426765	1522	62	8994	1.6203
GOTERM_BP_DIRECT	GO:0042073~intraciliary transport	5	0.203004	0.0502605	416839, 417969, 418053, 429016, 424029	1522	9	8994	3.28296
GOTERM_BP_DIRECT	GO:0007492~endoderm development	5	0.203004	0.0502605	395655, 395132, 422210, 100858895, 395740	1522	9	8994	3.28296
GOTERM_BP_DIRECT	GO:0035137~hindlimb morphogenesis	5	0.203004	0.0502605	395359, 771246, 395713, 396308, 373988	1522	9	8994	3.28296
GOTERM_BP_DIRECT	GO:0071560~cellular response to transforming growth factor beta stimulus	8	0.324807	0.0511145	374168, 418195, 395237, 374148, 418185, 414880, 429040, 396294	1522	21	8994	2.25117
GOTERM_BP_DIRECT	GO:0051496~positive regulation of stress fiber assembly	8	0.324807	0.0511145	419455, 421928, 395871, 374135, 423453, 423395, 421900, 427339	1522	21	8994	2.25117
GOTERM_BP_DIRECT	GO:0035115~embryonic forelimb morphogenesis	8	0.324807	0.0511145	374168, 374243, 424141, 374142, 373988, 420804, 395327, 373976	1522	21	8994	2.25117
GOTERM_BP_DIRECT	GO:0007338~single fertilization	7	0.284206	0.0534275	771246, 420427, 422165, 503512, 418989, 395327, 101747322	1522	17	8994	2.43325
GOTERM_BP_DIRECT	GO:0009954~proximal/distal pattern formation	6	0.243605	0.0538982	395505, 430698, 771246, 395956, 420769, 395327	1522	13	8994	2.72738
GOTERM_BP_DIRECT	GO:0048147~negative regulation of fibroblast proliferation	6	0.243605	0.0538982	395237, 396085, 417679, 420192, 373935, 424356	1522	13	8994	2.72738
GOTERM_BP_DIRECT	GO:0016573~histone acetylation	6	0.243605	0.0538982	422053, 417656, 419233, 493647, 424309, 425919	1522	13	8994	2.72738
GOTERM_BP_DIRECT	GO:0007156~homophilic cell adhesion via plasma membrane adhesion molecules	21	0.852619	0.0586247	395166, 395167, 374007, 414745, 373894, 422438, 395168, 428065, 419305, 428063, 423644, 408048, 416191, 374068, 395292, 419073, 418425, 431363, 408051, 395215, 415797	1522	83	8994	1.49513
GOTERM_BP_DIRECT	GO:0001934~positive regulation of protein phosphorylation	11	0.44661	0.0594506	423824, 418237, 395871, 374148, 395967, 416826, 419613, 374182, 421116, 396341, 395941	1522	35	8994	1.85722
GOTERM_BP_DIRECT	GO:0043524~negative regulation of neuron apoptotic process	17	0.690215	0.0638168	428099, 418506, 395129, 424320, 419492, 395713, 693262, 418764, 396383, 422672, 422857, 374138, 420996, 419528, 419350, 395569, 424673	1522	64	8994	1.56967
GOTERM_BP_DIRECT	GO:0090307~mitotic spindle assembly	8	0.324807	0.0644169	418322, 419383, 418822, 427156, 419284, 423673, 421900, 415590	1522	22	8994	2.14885
GOTERM_BP_DIRECT	GO:0030513~positive regulation of BMP signaling pathway	8	0.324807	0.0644169	374147, 395655, 419392, 771557, 374018, 415738, 395822, 396412	1522	22	8994	2.14885
GOTERM_BP_DIRECT	GO:2000020~positive regulation of male gonad development	4	0.162404	0.0646059	420269, 374148, 395825, 101747322	1522	6	8994	3.93955
GOTERM_BP_DIRECT	GO:0010564~regulation of cell cycle process	4	0.162404	0.0646059	395237, 374148, 395851, 416560	1522	6	8994	3.93955
GOTERM_BP_DIRECT	GO:0048485~sympathetic nervous system development	4	0.162404	0.0646059	395713, 396085, 419106, 395569	1522	6	8994	3.93955
GOTERM_BP_DIRECT	GO:0021527~spinal cord association neuron differentiation	4	0.162404	0.0646059	771259, 395942, 373940, 396381	1522	6	8994	3.93955
GOTERM_BP_DIRECT	GO:0071901~negative regulation of protein serine/threonine kinase activity	4	0.162404	0.0646059	396227, 417181, 395858, 419097	1522	6	8994	3.93955
GOTERM_BP_DIRECT	GO:0033146~regulation of intracellular estrogen receptor signaling pathway	4	0.162404	0.0646059	415409, 422542, 418894, 421804	1522	6	8994	3.93955
GOTERM_BP_DIRECT	GO:0032835~glomerulus development	4	0.162404	0.0646059	426903, 425224, 771101, 101747322	1522	6	8994	3.93955
GOTERM_BP_DIRECT	GO:0003279~cardiac septum development	4	0.162404	0.0646059	416274, 396465, 416124, 396070	1522	6	8994	3.93955
GOTERM_BP_DIRECT	GO:0071526~semaphorin-plexin signaling pathway	7	0.284206	0.0690727	415932, 424842, 420115, 374089, 374109, 395825, 424248	1522	18	8994	2.29807
GOTERM_BP_DIRECT	GO:0046854~phosphatidylinositol phosphorylation	7	0.284206	0.0690727	423407, 420504, 429096, 420611, 416010, 421032, 422012	1522	18	8994	2.29807
GOTERM_BP_DIRECT	GO:0019933~cAMP-mediated signaling	7	0.284206	0.0690727	428573, 374148, 420935, 418185, 395340, 415732, 422418	1522	18	8994	2.29807
GOTERM_BP_DIRECT	GO:0001502~cartilage condensation	7	0.284206	0.0690727	374168, 374007, 374148, 769516, 414745, 396030, 374135	1522	18	8994	2.29807
GOTERM_BP_DIRECT	GO:0048706~embryonic skeletal system development	7	0.284206	0.0690727	395505, 395942, 395302, 100858556, 396324, 100858368, 417387	1522	18	8994	2.29807
GOTERM_BP_DIRECT	GO:0060395~SMAD protein signal transduction	11	0.44661	0.0703495	395679, 395177, 374138, 769516, 428181, 395132, 420519, 423776, 396412, 396053, 424673	1522	36	8994	1.80563
GOTERM_BP_DIRECT	GO:0043087~regulation of GTPase activity	9	0.365408	0.0724112	419455, 421928, 396402, 428437, 408032, 395559, 423682, 107054794, 427447	1522	27	8994	1.96978
GOTERM_BP_DIRECT	GO:0045668~negative regulation of osteoblast differentiation	9	0.365408	0.0724112	420007, 395237, 395655, 428181, 374207, 395132, 420701, 423776, 426885	1522	27	8994	1.96978
GOTERM_BP_DIRECT	GO:0010923~negative regulation of phosphatase activity	9	0.365408	0.0724112	423292, 771963, 423252, 416398, 416806, 421355, 420124, 772101, 416595	1522	27	8994	1.96978
GOTERM_BP_DIRECT	GO:0022008~neurogenesis	9	0.365408	0.0724112	395359, 430917, 419388, 426802, 419073, 395750, 395699, 417183, 421199	1522	27	8994	1.96978
GOTERM_BP_DIRECT	GO:0051056~regulation of small GTPase mediated signal transduction	6	0.243605	0.072541	423255, 416552, 428437, 417087, 421523, 423327	1522	14	8994	2.53257
GOTERM_BP_DIRECT	GO:0001656~metanephros development	6	0.243605	0.072541	395718, 430698, 396085, 420769, 395327, 101747322	1522	14	8994	2.53257
GOTERM_BP_DIRECT	GO:0097150~neuronal stem cell population maintenance	6	0.243605	0.072541	395655, 414745, 373941, 419392, 396043, 395204	1522	14	8994	2.53257
GOTERM_BP_DIRECT	GO:0048709~oligodendrocyte differentiation	6	0.243605	0.072541	374148, 420769, 395573, 395921, 396403, 418895	1522	14	8994	2.53257
GOTERM_BP_DIRECT	GO:0060174~limb bud formation	5	0.203004	0.0728457	374148, 374142, 373989, 373988, 395432	1522	10	8994	2.95466
GOTERM_BP_DIRECT	GO:0006893~Golgi to plasma membrane transport	5	0.203004	0.0728457	769006, 422747, 421994, 423299, 422751	1522	10	8994	2.95466
GOTERM_BP_DIRECT	GO:0002092~positive regulation of receptor internalization	5	0.203004	0.0728457	420646, 428099, 395129, 424402, 415805	1522	10	8994	2.95466
GOTERM_BP_DIRECT	GO:0070509~calcium ion import	5	0.203004	0.0728457	395895, 416526, 769385, 418895, 395760	1522	10	8994	2.95466
GOTERM_BP_DIRECT	GO:0030182~neuron differentiation	12	0.487211	0.0738371	395235, 374168, 427937, 374138, 428953, 374243, 395476, 395711, 374142, 429040, 422358, 423923	1522	41	8994	1.72956
GOTERM_BP_DIRECT	GO:0070445~regulation of oligodendrocyte progenitor proliferation	3	0.121803	0.0760934	421564, 414745, 396403	1522	3	8994	5.90933
GOTERM_BP_DIRECT	GO:0061337~cardiac conduction	3	0.121803	0.0760934	395891, 395278, 395670	1522	3	8994	5.90933
GOTERM_BP_DIRECT	GO:0071504~cellular response to heparin	3	0.121803	0.0760934	395237, 374148, 373967	1522	3	8994	5.90933
GOTERM_BP_DIRECT	GO:0050434~positive regulation of viral transcription	3	0.121803	0.0760934	395655, 426483, 417774	1522	3	8994	5.90933
GOTERM_BP_DIRECT	GO:0030510~regulation of BMP signaling pathway	3	0.121803	0.0760934	395713, 396324, 395214	1522	3	8994	5.90933
GOTERM_BP_DIRECT	GO:0031507~heterochromatin assembly	3	0.121803	0.0760934	423010, 416482, 776014	1522	3	8994	5.90933
GOTERM_BP_DIRECT	GO:0021776~smoothened signaling pathway involved in spinal cord motor neuron cell fate specification	3	0.121803	0.0760934	395956, 420769, 374118	1522	3	8994	5.90933
GOTERM_BP_DIRECT	GO:0097051~establishment of protein localization to endoplasmic reticulum membrane	3	0.121803	0.0760934	424290, 421343, 421994	1522	3	8994	5.90933
GOTERM_BP_DIRECT	GO:0021775~smoothened signaling pathway involved in ventral spinal cord interneuron specification	3	0.121803	0.0760934	395956, 420769, 374118	1522	3	8994	5.90933
GOTERM_BP_DIRECT	GO:0097156~fasciculation of motor neuron axon	3	0.121803	0.0760934	396402, 395825, 395559	1522	3	8994	5.90933
GOTERM_BP_DIRECT	GO:0072017~distal tubule development	3	0.121803	0.0760934	395655, 395713, 396043	1522	3	8994	5.90933
GOTERM_BP_DIRECT	GO:0014033~neural crest cell differentiation	3	0.121803	0.0760934	395545, 429040, 419097	1522	3	8994	5.90933
GOTERM_BP_DIRECT	GO:0007501~mesodermal cell fate specification	3	0.121803	0.0760934	395718, 724086, 395327	1522	3	8994	5.90933
GOTERM_BP_DIRECT	GO:0072137~condensed mesenchymal cell proliferation	3	0.121803	0.0760934	395166, 724086, 419073	1522	3	8994	5.90933
GOTERM_BP_DIRECT	GO:0008063~Toll signaling pathway	3	0.121803	0.0760934	421279, 423471, 776013	1522	3	8994	5.90933
GOTERM_BP_DIRECT	GO:0009791~post-embryonic development	13	0.527812	0.0763956	424320, 395412, 415408, 419106, 424210, 427262, 425026, 396381, 419455, 769935, 426986, 426690, 373976	1522	46	8994	1.67003
GOTERM_BP_DIRECT	GO:0001570~vasculogenesis	10	0.406009	0.0782246	396416, 420269, 423724, 428997, 374204, 396501, 396412, 426885, 425026, 101747322	1522	32	8994	1.84667
GOTERM_BP_DIRECT	GO:0009953~dorsal/ventral pattern formation	8	0.324807	0.0796212	374168, 396030, 418979, 420769, 422460, 421983, 395327, 396381	1522	23	8994	2.05542
GOTERM_BP_DIRECT	GO:0007165~signal transduction	46	1.86764	0.0837471	420299, 419843, 416509, 421009, 374118, 422136, 386577, 425805, 423064, 416115, 414344, 422879, 422740, 396020, 416556, 771557, 423512, 419402, 422379, 395186, 422162, 373854, 427306, 418724, 419106, 422557, 429069, 395101, 421574, 419304, 416564, 420500, 419516, 395359, 421564, 417821, 416904, 418990, 374135, 424133, 420856, 421053, 421199, 427872, 395695, 421032	1522	218	8994	1.24692
GOTERM_BP_DIRECT	GO:0090263~positive regulation of canonical Wnt signaling pathway	12	0.487211	0.0854309	374168, 395237, 769516, 419613, 427867, 425313, 769377, 374252, 374018, 395432, 427844, 419097	1522	42	8994	1.68838
GOTERM_BP_DIRECT	GO:0042060~wound healing	9	0.365408	0.0869957	374007, 417919, 426903, 395811, 395479, 396085, 419279, 418379, 395432	1522	28	8994	1.89943
GOTERM_BP_DIRECT	GO:0048843~negative regulation of axon extension involved in axon guidance	7	0.284206	0.087079	415932, 420115, 374089, 374109, 395825, 374142, 424248	1522	19	8994	2.17712
GOTERM_BP_DIRECT	GO:0050919~negative chemotaxis	7	0.284206	0.087079	415932, 420115, 374089, 374109, 395967, 395825, 374173	1522	19	8994	2.17712
GOTERM_BP_DIRECT	GO:0032956~regulation of actin cytoskeleton organization	7	0.284206	0.087079	426903, 421210, 374182, 396402, 417181, 107054794, 427447	1522	19	8994	2.17712
GOTERM_BP_DIRECT	GO:0001574~ganglioside biosynthetic process	6	0.243605	0.0942348	374155, 404746, 425243, 419718, 100858260, 414335	1522	15	8994	2.36373
GOTERM_BP_DIRECT	GO:0043388~positive regulation of DNA binding	6	0.243605	0.0942348	374138, 428181, 422094, 396383, 374179, 408035	1522	15	8994	2.36373
GOTERM_BP_DIRECT	GO:0002053~positive regulation of mesenchymal cell proliferation	6	0.243605	0.0942348	769935, 374148, 373941, 416092, 396308, 396516	1522	15	8994	2.36373
GOTERM_BP_DIRECT	GO:0060976~coronary vasculature development	6	0.243605	0.0942348	416274, 396465, 418979, 374118, 416124, 396070	1522	15	8994	2.36373
GOTERM_BP_DIRECT	GO:0043065~positive regulation of apoptotic process	22	0.89322	0.0953324	395108, 418761, 417181, 100858404, 425491, 503512, 423578, 374065, 429929, 395101, 430409, 419522, 395655, 395545, 396226, 415961, 416010, 424106, 395376, 772101, 373967, 417762	1522	93	8994	1.39791
GOTERM_BP_DIRECT	GO:0002062~chondrocyte differentiation	8	0.324807	0.0967201	425014, 374168, 724086, 374148, 395956, 396308, 419734, 396516	1522	24	8994	1.96978
GOTERM_BP_DIRECT	GO:0018107~peptidyl-threonine phosphorylation	8	0.324807	0.0967201	395928, 419455, 396356, 374138, 421597, 101751124, 374252, 423778	1522	24	8994	1.96978
GOTERM_BP_DIRECT	GO:0048513~animal organ development	4	0.162404	0.0991678	693262, 374017, 373988, 422878	1522	7	8994	3.37676
GOTERM_BP_DIRECT	GO:0001841~neural tube formation	4	0.162404	0.0991678	374007, 414745, 421069, 425375	1522	7	8994	3.37676
GOTERM_BP_DIRECT	GO:0060487~lung epithelial cell differentiation	4	0.162404	0.0991678	395718, 374148, 423578, 424342	1522	7	8994	3.37676
GOTERM_BP_DIRECT	GO:0034063~stress granule assembly	4	0.162404	0.0991678	421961, 416877, 423461, 427919	1522	7	8994	3.37676
GOTERM_BP_DIRECT	GO:0060307~regulation of ventricular cardiac muscle cell membrane repolarization	4	0.162404	0.0991678	768444, 395278, 396502, 395695	1522	7	8994	3.37676
GOTERM_BP_DIRECT	GO:0048103~somatic stem cell division	4	0.162404	0.0991678	374168, 426903, 395655, 493647	1522	7	8994	3.37676
GOTERM_BP_DIRECT	GO:0003351~epithelial cilium movement	4	0.162404	0.0991678	415943, 431654, 418225, 424210	1522	7	8994	3.37676
GOTERM_BP_DIRECT	GO:0060059~embryonic retina morphogenesis in camera-type eye	4	0.162404	0.0991678	374138, 419710, 396381, 419097	1522	7	8994	3.37676
GOTERM_BP_DIRECT	GO:0060766~negative regulation of androgen receptor signaling pathway	4	0.162404	0.0991678	423646, 395237, 416383, 421697	1522	7	8994	3.37676
GOTERM_BP_DIRECT	GO:0021549~cerebellum development	5	0.203004	0.0996623	395253, 396375, 769935, 422946, 396381	1522	11	8994	2.68606
GOTERM_BP_DIRECT	GO:0007585~respiratory gaseous exchange	5	0.203004	0.0996623	416274, 426986, 373935, 395606, 417093	1522	11	8994	2.68606
GOTERM_BP_DIRECT	GO:1902043~positive regulation of extrinsic apoptotic signaling pathway via death domain receptors	5	0.203004	0.0996623	395237, 396085, 396030, 396087, 425375	1522	11	8994	2.68606
GOTERM_BP_DIRECT	GO:0002009~morphogenesis of an epithelium	5	0.203004	0.0996623	423644, 374148, 429134, 373988, 396422	1522	11	8994	2.68606
GOTERM_BP_DIRECT	GO:0008589~regulation of smoothened signaling pathway	5	0.203004	0.0996623	424176, 416758, 395956, 374103, 395432	1522	11	8994	2.68606
GOTERM_BP_DIRECT	GO:2001234~negative regulation of apoptotic signaling pathway	5	0.203004	0.0996623	424320, 493647, 396227, 419406, 425919	1522	11	8994	2.68606
GOTERM_BP_DIRECT	GO:0048844~artery morphogenesis	5	0.203004	0.0996623	396085, 373941, 423724, 771557, 396502	1522	11	8994	2.68606

## Sheet: cluster 7
Category	Term	Count	%	PValue	Genes	List Total	Pop Hits	Pop Total	Fold Enrichment
GOTERM_BP_DIRECT	GO:0045087~innate immune response	6	1.66205	0.0359396	429807, 395724, 426356, 396442, 374117, 770387	162	102	8994	3.2658
GOTERM_BP_DIRECT	GO:0045860~positive regulation of protein kinase activity	3	0.831025	0.0490089	396196, 429089, 395917	162	20	8994	8.32778
GOTERM_BP_DIRECT	GO:0034644~cellular response to UV	3	0.831025	0.0582251	428916, 424800, 416977	162	22	8994	7.57071
GOTERM_BP_DIRECT	GO:0035264~multicellular organism growth	4	1.10803	0.0628329	395917, 431192, 425673, 420438	162	51	8994	4.35439
GOTERM_BP_DIRECT	GO:0010524~positive regulation of calcium ion transport into cytosol	2	0.554017	0.0697148	771952, 374153	162	4	8994	27.7593
GOTERM_BP_DIRECT	GO:0050718~positive regulation of interleukin-1 beta secretion	2	0.554017	0.0697148	771952, 395724	162	4	8994	27.7593
GOTERM_BP_DIRECT	GO:0043154~negative regulation of cysteine-type endopeptidase activity involved in apoptotic process	3	0.831025	0.0782397	374078, 396442, 416977	162	26	8994	6.40598
GOTERM_BP_DIRECT	GO:0030036~actin cytoskeleton organization	4	1.10803	0.0784974	416515, 395917, 101750781, 422336	162	56	8994	3.96561
GOTERM_BP_DIRECT	GO:0030520~intracellular estrogen receptor signaling pathway	2	0.554017	0.0863751	396442, 415330	162	5	8994	22.2074
GOTERM_BP_DIRECT	GO:0051901~positive regulation of mitochondrial depolarization	2	0.554017	0.0863751	771952, 395847	162	5	8994	22.2074
GOTERM_BP_DIRECT	GO:0010954~positive regulation of protein processing	2	0.554017	0.0863751	396442, 424800	162	5	8994	22.2074
GOTERM_BP_DIRECT	GO:0048538~thymus development	3	0.831025	0.0889416	428916, 395601, 396179	162	28	8994	5.94841
GOTERM_BP_DIRECT	GO:0042981~regulation of apoptotic process	5	1.38504	0.0904682	395385, 404533, 423878, 418163, 426109	162	95	8994	2.92203

## Sheet: cluster 8
Category	Term	Count	%	PValue	Genes	List Total	Pop Hits	Pop Total	Fold Enrichment
GOTERM_BP_DIRECT	GO:0048041~focal adhesion assembly	3	0.757576	0.0252428	418642, 415457, 423589	190	12	8994	11.8342
GOTERM_BP_DIRECT	GO:0010629~negative regulation of gene expression	5	1.26263	0.0497009	416882, 425370, 396192, 418546, 395394	190	66	8994	3.58612
GOTERM_BP_DIRECT	GO:0007601~visual perception	5	1.26263	0.0784234	418546, 373998, 427540, 395898, 395091	190	77	8994	3.07382

## Sheet: cluster 9
Category	Term	Count	%	PValue	Genes	List Total	Pop Hits	Pop Total	Fold Enrichment
GOTERM_BP_DIRECT	GO:0006954~inflammatory response	18	2.5974	2.64735e-05	428264, 396370, 426274, 374141, 423908, 417241, 100859840, 417533, 395111, 418325, 395551, 378783, 395294, 396214, 100859903, 772372, 769909, 396500	395	124	8994	3.30527
GOTERM_BP_DIRECT	GO:0006955~immune response	15	2.1645	0.000272874	428264, 416325, 378930, 416932, 474361, 427448, 100858035, 100858200, 418325, 395551, 395294, 420193, 417730, 769909, 771679	395	109	8994	3.13343
GOTERM_BP_DIRECT	GO:0007166~cell surface receptor signaling pathway	14	2.0202	0.000360199	768996, 395105, 395899, 395329, 419940, 395111, 374256, 428727, 693264, 417730, 100859173, 426128, 418390, 772096	395	99	8994	3.21995
GOTERM_BP_DIRECT	GO:0030282~bone mineralization	6	0.865801	0.000460095	395386, 415954, 395562, 422992, 395683, 396071	395	16	8994	8.53861
GOTERM_BP_DIRECT	GO:0001958~endochondral ossification	4	0.577201	0.0105837	422488, 395650, 374126, 395683	395	11	8994	8.27986
GOTERM_BP_DIRECT	GO:0045348~positive regulation of MHC class II biosynthetic process	3	0.4329	0.0108296	428264, 416918, 417241	395	4	8994	17.0772
GOTERM_BP_DIRECT	GO:0002360~T cell lineage commitment	3	0.4329	0.0108296	420193, 423165, 417570	395	4	8994	17.0772
GOTERM_BP_DIRECT	GO:0001503~ossification	6	0.865801	0.0135617	421838, 769909, 395912, 396071, 396152, 404539	395	33	8994	4.13993
GOTERM_BP_DIRECT	GO:0071356~cellular response to tumor necrosis factor	6	0.865801	0.0172765	395551, 416457, 100859903, 424787, 417533, 427428	395	35	8994	3.90336
GOTERM_BP_DIRECT	GO:0007200~phospholipase C-activating G-protein coupled receptor signaling pathway	6	0.865801	0.0172765	107057039, 396114, 427800, 415713, 431416, 431664	395	35	8994	3.90336
GOTERM_BP_DIRECT	GO:0034142~toll-like receptor 4 signaling pathway	3	0.4329	0.0347284	373902, 417241, 100194427	395	7	8994	9.75841
GOTERM_BP_DIRECT	GO:0007218~neuropeptide signaling pathway	6	0.865801	0.0353477	428727, 693264, 427800, 431664, 378785, 422568	395	42	8994	3.2528
GOTERM_BP_DIRECT	GO:0007188~adenylate cyclase-modulating G-protein coupled receptor signaling pathway	4	0.577201	0.0417418	395425, 415713, 431416, 427851	395	18	8994	5.05992
GOTERM_BP_DIRECT	GO:0032689~negative regulation of interferon-gamma production	3	0.4329	0.0449837	428264, 693263, 417241	395	8	8994	8.53861
GOTERM_BP_DIRECT	GO:0030198~extracellular matrix organization	7	1.0101	0.049842	419969, 422488, 418637, 421509, 427445, 396071, 404539	395	61	8994	2.61291
GOTERM_BP_DIRECT	GO:0042742~defense response to bacterium	5	0.721501	0.0545159	428264, 373902, 396218, 417241, 414877	395	33	8994	3.44994
GOTERM_BP_DIRECT	GO:0014002~astrocyte development	3	0.4329	0.0682529	419969, 396214, 417241	395	10	8994	6.83089
GOTERM_BP_DIRECT	GO:0000187~activation of MAPK activity	5	0.721501	0.0769302	378783, 418090, 771215, 417241, 374256	395	37	8994	3.07698
GOTERM_BP_DIRECT	GO:0032715~negative regulation of interleukin-6 production	3	0.4329	0.0810682	428264, 373902, 417241	395	11	8994	6.2099
GOTERM_BP_DIRECT	GO:1900227~positive regulation of NLRP3 inflammasome complex assembly	2	0.2886	0.0856996	417730, 417241	395	2	8994	22.7696
GOTERM_BP_DIRECT	GO:0055096~low-density lipoprotein particle mediated signaling	2	0.2886	0.0856996	417730, 414849	395	2	8994	22.7696
GOTERM_BP_DIRECT	GO:0042517~positive regulation of tyrosine phosphorylation of Stat3 protein	3	0.4329	0.09455	378783, 396488, 395684	395	12	8994	5.69241

## Sheet: cluster 10
Category	Term	Count	%	PValue	Genes	List Total	Pop Hits	Pop Total	Fold Enrichment
GOTERM_BP_DIRECT	GO:0007155~cell adhesion	51	2.07149	1.21572e-09	396276, 428253, 395153, 396440, 395194, 395875, 395429, 396395, 395422, 426312, 425976, 395565, 395560, 395568, 420721, 396149, 396000, 424231, 373987, 395951, 396292, 378897, 417786, 427850, 422719, 395897, 776271, 418378, 395798, 423385, 395493, 428431, 100858912, 396225, 421888, 421749, 415986, 421709, 395687, 414837, 427564, 395317, 427968, 395450, 429374, 395398, 428006, 396213, 421154, 4185…	1497	129	8994	2.37526
GOTERM_BP_DIRECT	GO:0060291~long-term synaptic potentiation	15	0.609261	1.67872e-07	396444, 770104, 395759, 427633, 423675, 395393, 424805, 427678, 396239, 396213, 414891, 427850, 396157, 771502, 101747697	1497	20	8994	4.50601
GOTERM_BP_DIRECT	GO:0007268~chemical synaptic transmission	32	1.29976	9.00794e-07	415959, 421131, 771973, 422405, 395391, 395392, 417852, 416112, 430019, 428409, 428635, 419251, 427907, 415413, 414893, 415960, 396289, 421644, 427246, 428420, 395581, 395273, 404747, 427667, 770907, 415616, 395986, 428547, 422942, 395677, 421858, 771648	1497	78	8994	2.46483
GOTERM_BP_DIRECT	GO:0051965~positive regulation of synapse assembly	20	0.812348	2.03291e-06	396081, 424819, 395372, 770104, 100859755, 419945, 423385, 431646, 395398, 422287, 423649, 418798, 422261, 418297, 770169, 396157, 771502, 396337, 396177, 101747697	1497	38	8994	3.16211
GOTERM_BP_DIRECT	GO:0060134~prepulse inhibition	8	0.324939	2.38139e-05	428252, 395398, 396246, 423675, 769001, 422520, 419416, 404296	1497	8	8994	6.00802
GOTERM_BP_DIRECT	GO:0007613~memory	16	0.649878	2.46139e-05	417965, 414831, 374001, 395759, 421018, 427633, 416187, 427678, 416734, 396225, 771015, 395549, 414891, 426883, 414893, 423884	1497	30	8994	3.20428
GOTERM_BP_DIRECT	GO:0042391~regulation of membrane potential	18	0.731113	4.45877e-05	415868, 428226, 396263, 374001, 101748788, 419945, 420264, 428142, 427611, 431590, 420648, 422411, 395434, 419619, 426883, 424940, 428369, 424184	1497	38	8994	2.8459
GOTERM_BP_DIRECT	GO:0007165~signal transduction	60	2.43704	5.79054e-05	421662, 395258, 418210, 386578, 395613, 420779, 422407, 374092, 430981, 415525, 768618, 420847, 395668, 422677, 415344, 421362, 421559, 422593, 417796, 422454, 419877, 420948, 396288, 426419, 374001, 395605, 395608, 395607, 416479, 420420, 429128, 420473, 424940, 415455, 429151, 776271, 424477, 424476, 420838, 419521, 418962, 395483, 554217, 420514, 396321, 424116, 423417, 378803, 419168, 1008584…	1497	218	8994	1.65358
GOTERM_BP_DIRECT	GO:0019228~neuronal action potential	8	0.324939	9.1667e-05	395947, 427900, 426869, 374143, 427633, 424180, 428628, 417852	1497	9	8994	5.34046
GOTERM_BP_DIRECT	GO:0007274~neuromuscular synaptic transmission	12	0.487409	0.000100861	429151, 427616, 395749, 386578, 395613, 404293, 419068, 424940, 395605, 395608, 396321, 395607	1497	20	8994	3.60481
GOTERM_BP_DIRECT	GO:0007409~axonogenesis	20	0.812348	0.000233254	428571, 428252, 419083, 424476, 101751011, 100858394, 418936, 417171, 420788, 422287, 415344, 424336, 373995, 418798, 395814, 422801, 417001, 415953, 396282, 374039	1497	50	8994	2.40321
GOTERM_BP_DIRECT	GO:0035094~response to nicotine	10	0.406174	0.000355616	429151, 374001, 386578, 395613, 396282, 424940, 395605, 395608, 396321, 395607	1497	16	8994	3.75501
GOTERM_BP_DIRECT	GO:0007267~cell-cell signaling	17	0.690496	0.000364273	396436, 396464, 776271, 378917, 396279, 396466, 395106, 420397, 772164, 395451, 422933, 395564, 428980, 395826, 420573, 395937, 428203	1497	40	8994	2.55341
GOTERM_BP_DIRECT	GO:0048149~behavioral response to ethanol	7	0.284322	0.000433027	428252, 421644, 374001, 418174, 422758, 395549, 374218	1497	8	8994	5.25701
GOTERM_BP_DIRECT	GO:0048265~response to pain	7	0.284322	0.00111575	396107, 374169, 395549, 427636, 427850, 420573, 395677	1497	9	8994	4.6729
GOTERM_BP_DIRECT	GO:0007626~locomotory behavior	19	0.77173	0.00122948	421614, 396444, 421644, 421131, 427246, 395749, 423718, 423675, 373906, 395613, 416734, 395389, 427050, 374169, 395549, 429070, 771502, 418525, 373933	1497	52	8994	2.19524
GOTERM_BP_DIRECT	GO:0060079~excitatory postsynaptic potential	8	0.324939	0.00126576	427678, 770104, 426388, 395113, 428628, 422520, 395393, 404296	1497	12	8994	4.00534
GOTERM_BP_DIRECT	GO:0030199~collagen fibril organization	11	0.446791	0.00147205	421352, 395814, 395798, 423986, 374046, 396228, 395826, 395546, 396243, 396474, 395568	1497	22	8994	3.00401
GOTERM_BP_DIRECT	GO:0007156~homophilic cell adhesion via plasma membrane adhesion molecules	26	1.05605	0.00157719	395372, 396098, 414842, 420912, 423718, 427553, 414847, 768760, 396202, 428487, 418825, 418297, 396107, 424819, 421049, 421029, 419719, 428249, 395291, 408049, 419222, 428490, 418800, 373927, 418525, 497211	1497	83	8994	1.88203
GOTERM_BP_DIRECT	GO:0014059~regulation of dopamine secretion	6	0.243704	0.00197602	428252, 395117, 420840, 395392, 395393, 396321	1497	7	8994	5.14973
GOTERM_BP_DIRECT	GO:0016525~negative regulation of angiogenesis	14	0.568643	0.00208571	404530, 424797, 421049, 395610, 395600, 100859755, 417892, 426312, 417486, 417117, 386571, 373987, 414837, 417561	1497	34	8994	2.47389
GOTERM_BP_DIRECT	GO:0098655~cation transmembrane transport	9	0.365556	0.00209896	429151, 374001, 386578, 395613, 424940, 395605, 395608, 396321, 395607	1497	16	8994	3.37951
GOTERM_BP_DIRECT	GO:0035249~synaptic transmission, glutamatergic	8	0.324939	0.00235036	421231, 418297, 428628, 422520, 427553, 431265, 404296, 430487	1497	13	8994	3.69724
GOTERM_BP_DIRECT	GO:0032012~regulation of ARF protein signal transduction	8	0.324939	0.00235036	427605, 420170, 418043, 770334, 418146, 416626, 422565, 422085	1497	13	8994	3.69724
GOTERM_BP_DIRECT	GO:0048169~regulation of long-term neuronal synaptic plasticity	7	0.284322	0.00239713	428252, 421018, 396229, 428628, 373933, 395393, 404296	1497	10	8994	4.20561
GOTERM_BP_DIRECT	GO:0048813~dendrite morphogenesis	11	0.446791	0.00324587	418903, 429011, 374242, 386747, 421924, 420840, 418525, 374175, 424001, 419416, 395753	1497	24	8994	2.75367
GOTERM_BP_DIRECT	GO:0048505~regulation of timing of cell differentiation	5	0.203087	0.003308	378917, 395943, 419070, 422802, 424805	1497	5	8994	6.00802
GOTERM_BP_DIRECT	GO:0001661~conditioned taste aversion	5	0.203087	0.003308	428252, 427633, 414893, 404296, 416112	1497	5	8994	6.00802
GOTERM_BP_DIRECT	GO:0051968~positive regulation of synaptic transmission, glutamatergic	5	0.203087	0.003308	395398, 770104, 396213, 427633, 427850	1497	5	8994	6.00802
GOTERM_BP_DIRECT	GO:0001525~angiogenesis	27	1.09667	0.00345651	396094, 395897, 378917, 396194, 374006, 395312, 418378, 395610, 423385, 423675, 101750767, 417398, 395398, 396202, 374137, 374223, 423668, 415377, 422930, 395560, 422261, 419736, 378897, 422802, 374177, 396177, 395074	1497	92	8994	1.76322
GOTERM_BP_DIRECT	GO:0051493~regulation of cytoskeleton organization	7	0.284322	0.00453486	395291, 396095, 424552, 422010, 374034, 419263, 395963	1497	11	8994	3.82328
GOTERM_BP_DIRECT	GO:0010975~regulation of neuron projection development	9	0.365556	0.00522522	396444, 396202, 395154, 420514, 423675, 395546, 422520, 418474, 417317	1497	18	8994	3.00401
GOTERM_BP_DIRECT	GO:0010811~positive regulation of cell-substrate adhesion	9	0.365556	0.00522522	416198, 769237, 418378, 427326, 421559, 374199, 427583, 415953, 420944	1497	18	8994	3.00401
GOTERM_BP_DIRECT	GO:0007631~feeding behavior	9	0.365556	0.00522522	428644, 421836, 395564, 396464, 422801, 422405, 396157, 428485, 421858	1497	18	8994	3.00401
GOTERM_BP_DIRECT	GO:0007411~axon guidance	21	0.852965	0.00598593	771373, 374090, 396149, 427387, 422781, 426920, 429011, 373911, 395997, 419222, 421352, 423802, 395943, 416102, 395560, 421709, 417786, 427850, 395180, 396177, 419416	1497	68	8994	1.85542
GOTERM_BP_DIRECT	GO:0007416~synapse assembly	10	0.406174	0.00598652	770104, 428006, 428249, 419719, 423385, 373906, 423675, 418297, 418525, 430723	1497	22	8994	2.73092
GOTERM_BP_DIRECT	GO:0007271~synaptic transmission, cholinergic	11	0.446791	0.0063998	429151, 395986, 374001, 386578, 423059, 395613, 424940, 395605, 395608, 396321, 395607	1497	26	8994	2.54185
GOTERM_BP_DIRECT	GO:0008542~visual learning	11	0.446791	0.0063998	428252, 768618, 427678, 770104, 421018, 396239, 395549, 427633, 374198, 374177, 404296	1497	26	8994	2.54185
GOTERM_BP_DIRECT	GO:0048741~skeletal muscle fiber development	9	0.365556	0.00772808	395291, 374004, 418306, 427991, 421534, 395113, 427181, 420389, 374048	1497	19	8994	2.8459
GOTERM_BP_DIRECT	GO:0006486~protein glycosylation	17	0.690496	0.00833842	416796, 395139, 423263, 769122, 421305, 420642, 423414, 417163, 414336, 771133, 418846, 422560, 427539, 417480, 395073, 403122, 396169	1497	52	8994	1.96416
GOTERM_BP_DIRECT	GO:0007399~nervous system development	21	0.852965	0.00847579	396081, 419173, 423117, 423694, 386578, 373906, 395136, 396438, 422411, 424831, 421352, 395554, 396225, 427050, 395969, 416645, 395945, 374198, 395351, 418515, 427203	1497	70	8994	1.8024
GOTERM_BP_DIRECT	GO:0030198~extracellular matrix organization	19	0.77173	0.00854798	395897, 428253, 378803, 395429, 423856, 422781, 422415, 424366, 415818, 769237, 396225, 421914, 395509, 421559, 396213, 417794, 421657, 419413, 415953	1497	61	8994	1.87135
GOTERM_BP_DIRECT	GO:0042711~maternal behavior	5	0.203087	0.00861469	395098, 395549, 427633, 423675, 416206	1497	6	8994	5.00668
GOTERM_BP_DIRECT	GO:0050806~positive regulation of synaptic transmission	5	0.203087	0.00861469	424819, 395372, 396083, 418297, 428628	1497	6	8994	5.00668
GOTERM_BP_DIRECT	GO:0001764~neuron migration	18	0.731113	0.0093241	771373, 426737, 414831, 424063, 419719, 427387, 422781, 422569, 418903, 421431, 395959, 395943, 416102, 374242, 422801, 427850, 396157, 429070	1497	57	8994	1.89727
GOTERM_BP_DIRECT	GO:0030534~adult behavior	8	0.324939	0.00989396	396289, 101747752, 395398, 418825, 770104, 418798, 423675, 416112	1497	16	8994	3.00401
GOTERM_BP_DIRECT	GO:0007187~G-protein coupled receptor signaling pathway, coupled to cyclic nucleotide second messenger	8	0.324939	0.00989396	419251, 427667, 421644, 415616, 427907, 428547, 430019, 771648	1497	16	8994	3.00401
GOTERM_BP_DIRECT	GO:0010976~positive regulation of neuron projection development	13	0.528026	0.010806	396107, 424477, 395703, 396095, 418936, 429374, 426699, 421910, 417786, 425522, 396157, 396337, 419416	1497	36	8994	2.16956
GOTERM_BP_DIRECT	GO:0019233~sensory perception of pain	9	0.365556	0.0110339	427678, 421614, 419251, 421644, 421131, 374143, 100859798, 420573, 404296	1497	20	8994	2.70361
GOTERM_BP_DIRECT	GO:0048839~inner ear development	9	0.365556	0.0110339	395291, 395802, 420744, 769989, 424476, 395451, 422849, 374106, 395754	1497	20	8994	2.70361
GOTERM_BP_DIRECT	GO:0071230~cellular response to amino acid stimulus	11	0.446791	0.0115272	423875, 386583, 430477, 395509, 423986, 772019, 396157, 396243, 396000, 423816, 395963	1497	28	8994	2.36029
GOTERM_BP_DIRECT	GO:0051966~regulation of synaptic transmission, glutamatergic	7	0.284322	0.0124785	421614, 418644, 396083, 373933, 424805, 416112, 419906	1497	13	8994	3.23509
GOTERM_BP_DIRECT	GO:0043524~negative regulation of neuron apoptotic process	19	0.77173	0.0143386	395885, 396466, 428628, 395391, 395393, 424971, 416102, 396239, 100859798, 395560, 396229, 771525, 414890, 396290, 396157, 396282, 404293, 396337, 404296	1497	64	8994	1.78363
GOTERM_BP_DIRECT	GO:0034220~ion transmembrane transport	9	0.365556	0.0152765	421088, 396300, 427900, 416871, 770753, 769904, 415402, 374124, 428716	1497	21	8994	2.57486
GOTERM_BP_DIRECT	GO:0007158~neuron cell-cell adhesion	6	0.243704	0.015278	396107, 396202, 770104, 428006, 396213, 429070	1497	10	8994	3.60481
GOTERM_BP_DIRECT	GO:0010001~glial cell differentiation	6	0.243704	0.015278	395959, 419141, 427850, 427955, 770657, 396209	1497	10	8994	3.60481
GOTERM_BP_DIRECT	GO:0007218~neuropeptide signaling pathway	14	0.568643	0.0157542	396464, 424937, 423117, 769742, 421131, 422405, 422411, 419251, 395668, 395564, 415616, 427907, 772019, 428512	1497	42	8994	2.00267
GOTERM_BP_DIRECT	GO:0032228~regulation of synaptic transmission, GABAergic	5	0.203087	0.0174662	428252, 420645, 424060, 422758, 423675	1497	7	8994	4.29144
GOTERM_BP_DIRECT	GO:0050650~chondroitin sulfate proteoglycan biosynthetic process	5	0.203087	0.0174662	423632, 408180, 422849, 428638, 373949	1497	7	8994	4.29144
GOTERM_BP_DIRECT	GO:0040037~negative regulation of fibroblast growth factor receptor signaling pathway	5	0.203087	0.0174662	419209, 395703, 373987, 395584, 426312	1497	7	8994	4.29144
GOTERM_BP_DIRECT	GO:0048709~oligodendrocyte differentiation	7	0.284322	0.0188143	421340, 770104, 395483, 395759, 419889, 373906, 396157	1497	14	8994	3.00401
GOTERM_BP_DIRECT	GO:0060612~adipose tissue development	7	0.284322	0.0188143	395176, 427625, 395727, 424971, 395483, 423114, 423661	1497	14	8994	3.00401
GOTERM_BP_DIRECT	GO:0034765~regulation of ion transmembrane transport	7	0.284322	0.0188143	396369, 416871, 396328, 374169, 419945, 395116, 396157	1497	14	8994	3.00401
GOTERM_BP_DIRECT	GO:0046426~negative regulation of JAK-STAT cascade	10	0.406174	0.0201346	428862, 428570, 424647, 423649, 419539, 417001, 374083, 417892, 771502, 395754	1497	26	8994	2.31078
GOTERM_BP_DIRECT	GO:0050808~synapse organization	8	0.324939	0.020313	428006, 396213, 395391, 416465, 771502, 395392, 395393, 101747697	1497	18	8994	2.67023
GOTERM_BP_DIRECT	GO:0035690~cellular response to drug	9	0.365556	0.0205851	396452, 378926, 424700, 396239, 101747503, 395113, 429110, 427979, 421858	1497	22	8994	2.45782
GOTERM_BP_DIRECT	GO:0035176~social behavior	9	0.365556	0.0205851	395398, 404747, 427050, 770104, 395098, 428934, 423675, 419416, 404296	1497	22	8994	2.45782
GOTERM_BP_DIRECT	GO:0045666~positive regulation of neuron differentiation	12	0.487409	0.0226367	422016, 415379, 419070, 429077, 395098, 424912, 374083, 420944, 424433, 417495, 395754, 428995	1497	35	8994	2.05989
GOTERM_BP_DIRECT	GO:0035556~intracellular signal transduction	47	1.90902	0.0228212	420675, 424060, 426454, 420677, 423408, 425524, 422407, 430487, 416693, 395620, 427201, 428984, 415413, 417796, 395685, 429110, 374188, 423314, 420682, 100857587, 420645, 395438, 417513, 424839, 419954, 424030, 421570, 373906, 422850, 428708, 429021, 431265, 417430, 418903, 415354, 416351, 420357, 429128, 416746, 374242, 396239, 424606, 374199, 419416, 395171, 776459, 424745	1497	208	8994	1.35758
GOTERM_BP_DIRECT	GO:0007269~neurotransmitter secretion	6	0.243704	0.0242306	395398, 374169, 423385, 415963, 404293, 419416	1497	11	8994	3.2771
GOTERM_BP_DIRECT	GO:0030514~negative regulation of BMP signaling pathway	11	0.446791	0.0243208	395703, 373985, 420744, 770427, 395826, 395546, 420944, 374024, 422868, 428995, 427689	1497	31	8994	2.13188
GOTERM_BP_DIRECT	GO:0048791~calcium ion-regulated exocytosis of neurotransmitter	7	0.284322	0.0270348	428226, 396083, 422960, 416886, 423614, 420264, 428142	1497	15	8994	2.80374
GOTERM_BP_DIRECT	GO:0048812~neuron projection morphogenesis	9	0.365556	0.0270797	395870, 417117, 396466, 419719, 422569, 420840, 421055, 428309, 424802	1497	23	8994	2.35096
GOTERM_BP_DIRECT	GO:0007605~sensory perception of sound	17	0.690496	0.0282872	395716, 396431, 395779, 419945, 423718, 395584, 415476, 395317, 416624, 417217, 374106, 416112, 395487, 420494, 414890, 395686, 396290	1497	59	8994	1.73112
GOTERM_BP_DIRECT	GO:0001558~regulation of cell growth	11	0.446791	0.0302584	395372, 776271, 374271, 395067, 420790, 424220, 423856, 418297, 421055, 422868, 769726	1497	32	8994	2.06526
GOTERM_BP_DIRECT	GO:0090129~positive regulation of synapse maturation	5	0.203087	0.0303848	395398, 423875, 417117, 423385, 427850	1497	8	8994	3.75501
GOTERM_BP_DIRECT	GO:2000463~positive regulation of excitatory postsynaptic potential	5	0.203087	0.0303848	395398, 770104, 421018, 423675, 427850	1497	8	8994	3.75501
GOTERM_BP_DIRECT	GO:0007189~adenylate cyclase-activating G-protein coupled receptor signaling pathway	9	0.365556	0.0348672	420385, 420328, 420401, 424548, 396281, 422013, 428425, 395339, 420788	1497	24	8994	2.25301
GOTERM_BP_DIRECT	GO:0002062~chondrocyte differentiation	9	0.365556	0.0348672	374249, 378917, 420401, 404773, 771523, 422849, 396209, 769687, 100316920	1497	24	8994	2.25301
GOTERM_BP_DIRECT	GO:0001568~blood vessel development	9	0.365556	0.0348672	416553, 424666, 421352, 395943, 421749, 428199, 419954, 396243, 395568	1497	24	8994	2.25301
GOTERM_BP_DIRECT	GO:0032740~positive regulation of interleukin-17 production	4	0.16247	0.0352583	420420, 395312, 395258, 776459	1497	5	8994	4.80641
GOTERM_BP_DIRECT	GO:0060509~Type I pneumocyte differentiation	4	0.16247	0.0352583	396251, 396431, 420148, 396209	1497	5	8994	4.80641
GOTERM_BP_DIRECT	GO:0048268~clathrin coat assembly	4	0.16247	0.0352583	428635, 424633, 395251, 416212	1497	5	8994	4.80641
GOTERM_BP_DIRECT	GO:0060074~synapse maturation	4	0.16247	0.0352583	396210, 416906, 426388, 423675	1497	5	8994	4.80641
GOTERM_BP_DIRECT	GO:0070208~protein heterotrimerization	4	0.16247	0.0352583	416156, 396292, 396243, 396000	1497	5	8994	4.80641
GOTERM_BP_DIRECT	GO:0030204~chondroitin sulfate metabolic process	4	0.16247	0.0352583	421028, 408180, 428638, 373949	1497	5	8994	4.80641
GOTERM_BP_DIRECT	GO:0048743~positive regulation of skeletal muscle fiber development	4	0.16247	0.0352583	374004, 417873, 396282, 374048	1497	5	8994	4.80641
GOTERM_BP_DIRECT	GO:0045636~positive regulation of melanocyte differentiation	4	0.16247	0.0352583	416080, 417794, 424306, 396282	1497	5	8994	4.80641
GOTERM_BP_DIRECT	GO:0007611~learning or memory	6	0.243704	0.0359639	396251, 415422, 423675, 424721, 431265, 395730	1497	12	8994	3.00401
GOTERM_BP_DIRECT	GO:0016358~dendrite development	7	0.284322	0.0373193	395560, 374198, 427850, 427863, 769001, 374083, 419225	1497	16	8994	2.62851
GOTERM_BP_DIRECT	GO:0035987~endodermal cell differentiation	7	0.284322	0.0373193	386583, 418378, 395875, 396181, 374046, 396361, 396000	1497	16	8994	2.62851
GOTERM_BP_DIRECT	GO:0007193~adenylate cyclase-inhibiting G-protein coupled receptor signaling pathway	10	0.406174	0.0405846	419251, 421644, 420328, 771973, 422405, 395581, 422013, 421858, 395339, 420788	1497	29	8994	2.07173
GOTERM_BP_DIRECT	GO:0007601~visual perception	20	0.812348	0.0451189	415492, 396108, 428582, 771085, 374000, 428420, 418393, 396499, 422411, 374124, 395273, 423609, 395526, 395536, 423619, 395537, 421815, 374046, 414891, 772371	1497	77	8994	1.56052
GOTERM_BP_DIRECT	GO:0031175~neuron projection development	14	0.568643	0.0457394	415447, 418915, 428253, 395564, 420094, 426737, 419070, 770422, 396095, 422010, 415578, 420840, 424001, 419263	1497	48	8994	1.75234
GOTERM_BP_DIRECT	GO:0045471~response to ethanol	5	0.203087	0.0476226	427678, 417965, 770134, 769001, 404296	1497	9	8994	3.33779
GOTERM_BP_DIRECT	GO:0046849~bone remodeling	5	0.203087	0.0476226	374031, 419521, 423114, 428605, 421858	1497	9	8994	3.33779
GOTERM_BP_DIRECT	GO:0007616~long-term memory	5	0.203087	0.0476226	420328, 427850, 414893, 404296, 420788	1497	9	8994	3.33779
GOTERM_BP_DIRECT	GO:0042346~positive regulation of NF-kappaB import into nucleus	5	0.203087	0.0476226	420420, 418638, 395826, 418717, 428015	1497	9	8994	3.33779
GOTERM_BP_DIRECT	GO:0010507~negative regulation of autophagy	5	0.203087	0.0476226	374223, 420923, 418145, 395581, 396282	1497	9	8994	3.33779
GOTERM_BP_DIRECT	GO:0042593~glucose homeostasis	16	0.649878	0.0486669	424220, 378796, 421899, 374092, 395754, 427667, 374223, 428633, 396338, 395943, 428980, 420570, 395549, 771549, 429110, 374177	1497	58	8994	1.65738
GOTERM_BP_DIRECT	GO:0048856~anatomical structure development	6	0.243704	0.0506424	422586, 395716, 386571, 100859787, 107054875, 771525	1497	13	8994	2.77293
GOTERM_BP_DIRECT	GO:0033138~positive regulation of peptidyl-serine phosphorylation	13	0.528026	0.0511524	396081, 419083, 395668, 427642, 424971, 395703, 396239, 420215, 395584, 395546, 396157, 396282, 395393	1497	44	8994	1.7751
GOTERM_BP_DIRECT	GO:0051091~positive regulation of sequence-specific DNA binding transcription factor activity	13	0.528026	0.0511524	430953, 427996, 395575, 424666, 395727, 421853, 423114, 423661, 423675, 395113, 422849, 396099, 395754	1497	44	8994	1.7751
GOTERM_BP_DIRECT	GO:0007204~positive regulation of cytosolic calcium ion concentration	11	0.446791	0.0540205	419251, 422933, 424957, 415363, 418198, 424548, 427636, 420573, 428512, 428425, 428203	1497	35	8994	1.88823
GOTERM_BP_DIRECT	GO:0018108~peptidyl-tyrosine phosphorylation	11	0.446791	0.0540205	395997, 396081, 395509, 373897, 374034, 427850, 427864, 396157, 396337, 396177, 395171	1497	35	8994	1.88823
GOTERM_BP_DIRECT	GO:0007612~learning	8	0.324939	0.0597185	416734, 414831, 395759, 422776, 414891, 396157, 373933, 423884	1497	22	8994	2.18473
GOTERM_BP_DIRECT	GO:0055013~cardiac muscle cell development	4	0.16247	0.0619019	395802, 396263, 378796, 422760	1497	6	8994	4.00534
GOTERM_BP_DIRECT	GO:1901741~positive regulation of myoblast fusion	4	0.16247	0.0619019	374004, 419346, 417873, 374048	1497	6	8994	4.00534
GOTERM_BP_DIRECT	GO:0048048~embryonic eye morphogenesis	4	0.16247	0.0619019	373992, 428543, 374203, 396266	1497	6	8994	4.00534
GOTERM_BP_DIRECT	GO:0060292~long term synaptic depression	4	0.16247	0.0619019	414891, 427633, 414893, 404293	1497	6	8994	4.00534
GOTERM_BP_DIRECT	GO:0007435~salivary gland morphogenesis	4	0.16247	0.0619019	421352, 395943, 374024, 396438	1497	6	8994	4.00534
GOTERM_BP_DIRECT	GO:0071310~cellular response to organic substance	4	0.16247	0.0619019	396483, 404747, 424063, 396282	1497	6	8994	4.00534
GOTERM_BP_DIRECT	GO:0042417~dopamine metabolic process	4	0.16247	0.0619019	428252, 427678, 395391, 426796	1497	6	8994	4.00534
GOTERM_BP_DIRECT	GO:0071625~vocalization behavior	4	0.16247	0.0619019	395398, 770104, 395098, 422261	1497	6	8994	4.00534
GOTERM_BP_DIRECT	GO:0003009~skeletal muscle contraction	4	0.16247	0.0619019	396386, 396434, 427181, 395761	1497	6	8994	4.00534
GOTERM_BP_DIRECT	GO:1901379~regulation of potassium ion transmembrane transport	4	0.16247	0.0619019	396452, 395579, 395730, 420440	1497	6	8994	4.00534
GOTERM_BP_DIRECT	GO:0043086~negative regulation of catalytic activity	7	0.284322	0.0645374	396483, 427642, 421630, 768711, 374178, 769737, 395093	1497	18	8994	2.33645
GOTERM_BP_DIRECT	GO:0001502~cartilage condensation	7	0.284322	0.0645374	416553, 421352, 396251, 395714, 395798, 374046, 426312	1497	18	8994	2.33645
GOTERM_BP_DIRECT	GO:0051260~protein homooligomerization	24	0.974817	0.0668881	428098, 770173, 396452, 421393, 395117, 395107, 416156, 423076, 423577, 395116, 395481, 421359, 395721, 769400, 423225, 422752, 420278, 430463, 422930, 427644, 431181, 374143, 374228, 396089	1497	101	8994	1.42765
GOTERM_BP_DIRECT	GO:0045746~negative regulation of Notch signaling pathway	6	0.243704	0.0683246	423875, 423208, 423459, 100857779, 419070, 424912	1497	14	8994	2.57486
GOTERM_BP_DIRECT	GO:0060384~innervation	6	0.243704	0.0683246	419209, 414890, 396290, 424805, 430487, 426312	1497	14	8994	2.57486
GOTERM_BP_DIRECT	GO:0051491~positive regulation of filopodium assembly	6	0.243704	0.0683246	423875, 395668, 424477, 395154, 395560, 395671	1497	14	8994	2.57486
GOTERM_BP_DIRECT	GO:0046716~muscle cell cellular homeostasis	5	0.203087	0.0691857	422388, 378796, 374177, 373964, 418062	1497	10	8994	3.00401
GOTERM_BP_DIRECT	GO:0002063~chondrocyte development	5	0.203087	0.0691857	419209, 395798, 374046, 395546, 426312	1497	10	8994	3.00401
GOTERM_BP_DIRECT	GO:0045671~negative regulation of osteoclast differentiation	5	0.203087	0.0691857	417992, 770427, 427171, 395440, 424745	1497	10	8994	3.00401
GOTERM_BP_DIRECT	GO:0001975~response to amphetamine	5	0.203087	0.0691857	428252, 427678, 395549, 427633, 404296	1497	10	8994	3.00401
GOTERM_BP_DIRECT	GO:0001964~startle response	5	0.203087	0.0691857	427678, 421131, 421899, 373906, 422411	1497	10	8994	3.00401
GOTERM_BP_DIRECT	GO:0090287~regulation of cellular response to growth factor stimulus	3	0.121852	0.0737655	395079, 373992, 374203	1497	3	8994	6.00802
GOTERM_BP_DIRECT	GO:0097094~craniofacial suture morphogenesis	3	0.121852	0.0737655	396116, 421879, 427355	1497	3	8994	6.00802
GOTERM_BP_DIRECT	GO:0001956~positive regulation of neurotransmitter secretion	3	0.121852	0.0737655	420840, 395393, 430487	1497	3	8994	6.00802
GOTERM_BP_DIRECT	GO:0042490~mechanoreceptor differentiation	3	0.121852	0.0737655	396081, 396157, 396337	1497	3	8994	6.00802
GOTERM_BP_DIRECT	GO:0035881~amacrine cell differentiation	3	0.121852	0.0737655	395959, 395980, 395754	1497	3	8994	6.00802
GOTERM_BP_DIRECT	GO:0035989~tendon development	3	0.121852	0.0737655	374046, 374101, 395568	1497	3	8994	6.00802
GOTERM_BP_DIRECT	GO:0043030~regulation of macrophage activation	3	0.121852	0.0737655	415377, 395393, 422730	1497	3	8994	6.00802
GOTERM_BP_DIRECT	GO:0071435~potassium ion export	3	0.121852	0.0737655	374228, 427979, 374098	1497	3	8994	6.00802
GOTERM_BP_DIRECT	GO:0016048~detection of temperature stimulus	3	0.121852	0.0737655	427249, 771373, 424025	1497	3	8994	6.00802
GOTERM_BP_DIRECT	GO:0048050~post-embryonic eye morphogenesis	3	0.121852	0.0737655	373992, 428543, 395165	1497	3	8994	6.00802
GOTERM_BP_DIRECT	GO:0030334~regulation of cell migration	11	0.446791	0.0752869	419988, 395943, 421749, 396279, 395154, 419857, 395106, 424552, 421709, 378897, 424803	1497	37	8994	1.78617
GOTERM_BP_DIRECT	GO:0070588~calcium ion transmembrane transport	9	0.365556	0.0804391	415996, 374169, 414891, 428767, 426883, 373924, 427909, 395481, 417802	1497	28	8994	1.93115
GOTERM_BP_DIRECT	GO:0007628~adult walking behavior	7	0.284322	0.0815605	428252, 427460, 426737, 421249, 427633, 374083, 422411	1497	19	8994	2.21348
GOTERM_BP_DIRECT	GO:0007528~neuromuscular junction development	7	0.284322	0.0815605	396440, 373897, 428420, 427909, 396157, 416099, 430487	1497	19	8994	2.21348
GOTERM_BP_DIRECT	GO:0048843~negative regulation of axon extension involved in axon guidance	7	0.284322	0.0815605	415430, 420115, 374090, 395703, 395560, 427387, 396332	1497	19	8994	2.21348
GOTERM_BP_DIRECT	GO:0001503~ossification	10	0.406174	0.0847816	374004, 419521, 416362, 396251, 422930, 422824, 427611, 374024, 396282, 769687	1497	33	8994	1.82061
GOTERM_BP_DIRECT	GO:0007214~gamma-aminobutyric acid signaling pathway	6	0.243704	0.0889695	396289, 420645, 424060, 770511, 374214, 421815	1497	15	8994	2.40321
GOTERM_BP_DIRECT	GO:0010575~positive regulation of vascular endothelial growth factor production	6	0.243704	0.0889695	418198, 419209, 422930, 415377, 374177, 426312	1497	15	8994	2.40321
GOTERM_BP_DIRECT	GO:0050770~regulation of axonogenesis	6	0.243704	0.0889695	396107, 428862, 395814, 429021, 374039, 404296	1497	15	8994	2.40321
GOTERM_BP_DIRECT	GO:0001755~neural crest cell migration	12	0.487409	0.0893875	396107, 415430, 420115, 395483, 374090, 395671, 427387, 424306, 396332, 395581, 374177, 395481	1497	43	8994	1.67666
GOTERM_BP_DIRECT	GO:0051453~regulation of intracellular pH	8	0.324939	0.0901107	424772, 424188, 101748788, 419356, 422649, 427611, 425403, 428369	1497	24	8994	2.00267
GOTERM_BP_DIRECT	GO:0070374~positive regulation of ERK1 and ERK2 cascade	20	0.812348	0.0945861	420677, 420744, 770488, 423675, 417534, 395584, 395581, 415652, 768618, 396239, 395560, 427499, 395671, 396229, 421910, 420215, 396337, 414741, 107057238, 395171	1497	84	8994	1.43048
GOTERM_BP_DIRECT	GO:0046580~negative regulation of Ras protein signal transduction	5	0.203087	0.0948743	421352, 417117, 417513, 395583, 395584	1497	11	8994	2.73092
GOTERM_BP_DIRECT	GO:0019226~transmission of nerve impulse	5	0.203087	0.0948743	419736, 373924, 427909, 416624, 416112	1497	11	8994	2.73092
GOTERM_BP_DIRECT	GO:0042310~vasoconstriction	5	0.203087	0.0948743	428906, 373909, 395581, 422942, 421858	1497	11	8994	2.73092
GOTERM_BP_DIRECT	GO:0030239~myofibril assembly	5	0.203087	0.0948743	426075, 423744, 415422, 395547, 422682	1497	11	8994	2.73092
GOTERM_BP_DIRECT	GO:0033137~negative regulation of peptidyl-serine phosphorylation	5	0.203087	0.0948743	776542, 428906, 419521, 771549, 769469	1497	11	8994	2.73092
GOTERM_BP_DIRECT	GO:0016064~immunoglobulin mediated immune response	4	0.16247	0.0952287	422219, 420420, 414741, 424745	1497	7	8994	3.43315
GOTERM_BP_DIRECT	GO:0035640~exploration behavior	4	0.16247	0.0952287	416102, 395098, 428708, 771502	1497	7	8994	3.43315
GOTERM_BP_DIRECT	GO:0035725~sodium ion transmembrane transport	4	0.16247	0.0952287	419356, 414891, 426883, 417802	1497	7	8994	3.43315
GOTERM_BP_DIRECT	GO:0019370~leukotriene biosynthetic process	4	0.16247	0.0952287	770619, 416943, 770904, 423769	1497	7	8994	3.43315
GOTERM_BP_DIRECT	GO:0035584~calcium-mediated signaling using intracellular calcium source	4	0.16247	0.0952287	776542, 418652, 424548, 396157	1497	7	8994	3.43315
GOTERM_BP_DIRECT	GO:0071880~adenylate cyclase-activating adrenergic receptor signaling pathway	4	0.16247	0.0952287	422933, 428980, 428203, 395339	1497	7	8994	3.43315
GOTERM_BP_DIRECT	GO:0045909~positive regulation of vasodilation	4	0.16247	0.0952287	417403, 421049, 395807, 428708	1497	7	8994	3.43315
GOTERM_BP_DIRECT	GO:0090026~positive regulation of monocyte chemotaxis	4	0.16247	0.0952287	395180, 420696, 417802, 420695	1497	7	8994	3.43315
GOTERM_BP_DIRECT	GO:0060326~cell chemotaxis	9	0.365556	0.0956218	395509, 418198, 417535, 770488, 417536, 395451, 396177, 415651, 776459	1497	29	8994	1.86456
GOTERM_BP_DIRECT	GO:0050680~negative regulation of epithelial cell proliferation	9	0.365556	0.0956218	374249, 421352, 417117, 395943, 395703, 423685, 423675, 395546, 415603	1497	29	8994	1.86456
GOTERM_BP_DIRECT	GO:0043408~regulation of MAPK cascade	9	0.365556	0.0956218	396126, 417965, 374249, 386583, 421352, 422581, 396361, 373964, 396438	1497	29	8994	1.86456
